# Supplementary material for: Emergency department use for mental and substance use disorders: descriptive analysis of population-based, linked administrative data in British Columbia, Canada
Source: PubMed Central journal article supplement — BMJ Open. 2022 Jan 13;12(1):e057072. doi: 10.1136/bmjopen-2021-057072 (PMC8762129; doi:10.1136/bmjopen-2021-057072), 2022-01-13
Supplement: bmjopen-2021-057072.draft_revisions.pdf [file bmjopen-2021-057072.draft_revisions.pdf]

# BMJ Open

BMJ Open is committed to open peer review. As part of this commitment we make the peer review history of every article we publish publicly available.

When an article is published we post the peer reviewers' comments and the authors' responses online. We also post the versions of the paper that were used during peer review. These are the versions that the peer review comments apply to.

The versions of the paper that follow are the versions that were submitted during the peer review process. They are not the versions of record or the final published versions. They should not be cited or distributed as the published version of this manuscript.

BMJ Open is an open access journal and the full, final, typeset and author-corrected version of record of the manuscript is available on our site with no access controls, subscription charges or pay-per-view fees (<http://bmjopen.bmj.com>).

If you have any questions on BMJ Open's open peer review process please email [info.bmjopen@bmj.com](mailto:info.bmjopen@bmj.com)

# BMJ Open

## Emergency department use for mental and substance use disorders: Analysis of population-based, linked administrative data in British Columbia, Canada

|                               |                                                                                                                                                                                                                                                                                                                                                                                                                                                                                                                                                                                                                                                                                                                                                                                                                                                                                                                                                                                                                                                                                                                                                                                                                                                                                                                                                                                                                     |
|-------------------------------|---------------------------------------------------------------------------------------------------------------------------------------------------------------------------------------------------------------------------------------------------------------------------------------------------------------------------------------------------------------------------------------------------------------------------------------------------------------------------------------------------------------------------------------------------------------------------------------------------------------------------------------------------------------------------------------------------------------------------------------------------------------------------------------------------------------------------------------------------------------------------------------------------------------------------------------------------------------------------------------------------------------------------------------------------------------------------------------------------------------------------------------------------------------------------------------------------------------------------------------------------------------------------------------------------------------------------------------------------------------------------------------------------------------------|
| Journal:                      | <i>BMJ Open</i>                                                                                                                                                                                                                                                                                                                                                                                                                                                                                                                                                                                                                                                                                                                                                                                                                                                                                                                                                                                                                                                                                                                                                                                                                                                                                                                                                                                                     |
| Manuscript ID                 | bmjopen-2021-057072                                                                                                                                                                                                                                                                                                                                                                                                                                                                                                                                                                                                                                                                                                                                                                                                                                                                                                                                                                                                                                                                                                                                                                                                                                                                                                                                                                                                 |
| Article Type:                 | Original research                                                                                                                                                                                                                                                                                                                                                                                                                                                                                                                                                                                                                                                                                                                                                                                                                                                                                                                                                                                                                                                                                                                                                                                                                                                                                                                                                                                                   |
| Date Submitted by the Author: | 09-Sep-2021                                                                                                                                                                                                                                                                                                                                                                                                                                                                                                                                                                                                                                                                                                                                                                                                                                                                                                                                                                                                                                                                                                                                                                                                                                                                                                                                                                                                         |
| Complete List of Authors:     | <p>Lavergne, M.; Simon Fraser University, Faculty of Health Sciences; Centre for Gender &amp; Sexual Health Equity</p> <p>Shirmaleki, Mehdi; Simon Fraser University, Centre for Applied Health in Mental Health and Addiction</p> <p>Loyal, Jackson; Simon Fraser University at Harbour Centre, Centre for Applied Research in Mental Health and Addictions</p> <p>Jones, Wayne; Simon Fraser University, Centre for Applied Health in Mental Health and Addiction</p> <p>Nicholls, Tonia L.; The University of British Columbia Faculty of Medicine, Department of Psychiatry; Simon Fraser University, Department of Psychology</p> <p>Schütz, Christian; The University of British Columbia Faculty of Medicine, Department of Psychiatry; The University of British Columbia, Centre for Health Evaluation and Outcome Sciences</p> <p>Vaughan, Adam; Simon Fraser University; Texas State University San Marcos</p> <p>Samji, Hasina; Simon Fraser University; British Columbia Centre for Disease Control</p> <p>Puyat, Joseph; The University of British Columbia</p> <p>Kaoser, Ridhwana; Simon Fraser University, Centre for Applied Health in Mental Health and Addiction</p> <p>Kaulius, Megan; Simon Fraser University, Centre for Applied Health in Mental Health and Addiction</p> <p>Small, Will; Simon Fraser University, Faculty of Health Sciences; British Columbia Centre on Substance Use</p> |
| Keywords:                     | ACCIDENT & EMERGENCY MEDICINE, MENTAL HEALTH, Substance misuse < PSYCHIATRY                                                                                                                                                                                                                                                                                                                                                                                                                                                                                                                                                                                                                                                                                                                                                                                                                                                                                                                                                                                                                                                                                                                                                                                                                                                                                                                                         |
|                               |                                                                                                                                                                                                                                                                                                                                                                                                                                                                                                                                                                                                                                                                                                                                                                                                                                                                                                                                                                                                                                                                                                                                                                                                                                                                                                                                                                                                                     |

SCHOLARONE™  
Manuscripts

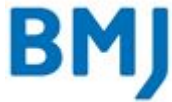

I, the Submitting Author has the right to grant and does grant on behalf of all authors of the Work (as defined in the below author licence), an exclusive licence and/or a non-exclusive licence for contributions from authors who are: i) UK Crown employees; ii) where BMJ has agreed a CC-BY licence shall apply, and/or iii) in accordance with the terms applicable for US Federal Government officers or employees acting as part of their official duties; on a worldwide, perpetual, irrevocable, royalty-free basis to BMJ Publishing Group Ltd ("BMJ") its licensees and where the relevant Journal is co-owned by BMJ to the co-owners of the Journal, to publish the Work in this journal and any other BMJ products and to exploit all rights, as set out in our [licence](#).

The Submitting Author accepts and understands that any supply made under these terms is made by BMJ to the Submitting Author unless you are acting as an employee on behalf of your employer or a postgraduate student of an affiliated institution which is paying any applicable article publishing charge ("APC") for Open Access articles. Where the Submitting Author wishes to make the Work available on an Open Access basis (and intends to pay the relevant APC), the terms of reuse of such Open Access shall be governed by a Creative Commons licence – details of these licences and which [Creative Commons](#) licence will apply to this Work are set out in our licence referred to above.

Other than as permitted in any relevant BMJ Author's Self Archiving Policies, I confirm this Work has not been accepted for publication elsewhere, is not being considered for publication elsewhere and does not duplicate material already published. I confirm all authors consent to publication of this Work and authorise the granting of this licence.

1  
2  
3 **Emergency department use for mental and substance use disorders: Analysis of population-**  
4 **based, linked administrative data in British Columbia, Canada**  
5  
6

7 M. Ruth Lavergne PhD,<sup>1,2,3</sup> Mehdi Shirmaleki MSc,<sup>1</sup> Jackson P. Loyal MPH,<sup>1</sup> Wayne Jones MA,  
8 MSc,<sup>1</sup> Tonia L. Nicholls PhD,<sup>4,5,6</sup> Christian G. Schütz MD, PhD, MPH,<sup>4,6,7</sup> Adam Vaughan PhD,<sup>2,8</sup>  
9 Hasina Samji PhD,<sup>1,2,9</sup> Joseph H. Puyat PhD,<sup>1,7,10</sup> Ridhwana Kaoser MPH,<sup>1</sup> Megan Kaulius MA,<sup>1</sup>  
10 Will Small PhD<sup>1,2,11</sup>  
11

- 12
- 13 1. Centre for Applied Research in Mental Health and Addiction, Simon Fraser University,
- 14 Vancouver, BC
- 15 2. Faculty of Health Sciences, Simon Fraser University, Burnaby, BC
- 16 3. Centre for Gender & Sexual Health Equity, Vancouver, Vancouver, BC
- 17 4. Department of Psychiatry, University of British Columbia, Vancouver BC
- 18 5. Department of Psychology, Simon Fraser University, Burnaby, BC
- 19 6. BC Mental Health and Substance Use Services, Vancouver, BC
- 20 7. Centre for Health Evaluation and Outcome Sciences, University of British Columbia,
- 21 Vancouver, BC
- 22 8. School of Criminal Justice and Criminology, Texas State University, San Marcos, TX
- 23 9. BC Centre for Disease Control, Vancouver, BC
- 24 10. School of Population and Public Health, University of British Columbia, Vancouver, BC
- 25 11. BC Centre on Substance Use, Vancouver, BC
- 26
- 27
- 28
- 29

30 **Corresponding author:**

31 M. Ruth Lavergne  
32 ruth\_lavergne@sfu.ca  
33 Simon Fraser University  
34 Blusson Hall 10502  
35 8888 University Dr.  
36 Burnaby BC, V5A 1S6  
37  
38

39  
40 **Word count: 2521**  
41  
42  
43  
44  
45  
46  
47  
48  
49  
50  
51  
52  
53  
54  
55  
56  
57  
58  
59  
60

## Abstract

**Objectives:** Tracking emergency department (ED) visits for mental and substance use disorders (MSUDs) and understanding the characteristics of people accessing EDs for MSUD is important for improving healthcare systems. In the context of the overdose crisis, ED visits for MSUD may have increased, but changes over time have not been explored in British Columbia (BC), Canada.

**Methods and setting:** Linked administrative data comprised of ED records and physician billings were used to capture all MSUD ED visits for all people age 15+ in BC. Patient characteristics (sex/gender, age, location of residence, income, treated disorders, and comorbidities) and previous outpatient service use for all ED visits by visit diagnosis, and for all people, by number of MSUD ED visits in 2017/8, were described.

**Population:** All people age  $\leq 15$  with MSUD ED visits during the study period.

**Measures:** Examined all claims with a service location in the ED or corresponding to fee items billed only in the ED. These were then stratified based on demographic, clinical, and health service use characteristics.

**Results:** 72,363 individuals made 134,063 MSUD ED visits in 2017/8. MSUD ED visits were evenly distributed by sex/gender. MSUD ED visits have increased since 2010. The most common diagnoses in 2017/8 were substance use, anxiety, and depression. People with more frequent visits were more likely to be male, ages 25-44, on public prescription drug plans for income assistance and psychiatric medications, and living in lower income neighbourhoods. They used more community-based primary care and psychiatry services but had lower continuity of primary care.

**Conclusions:** MSUD ED visits are substantial and growing in BC. Although substance use largely accounts for increasing rates over time, visits for anxiety and other conditions are also increasing. ED visits are disproportionately distributed across populations, signaling a need to expand and better target services for underserved groups.

**Key words:** mental disorders, substance use disorders, emergency services, emergency department visits, ambulatory care, administrative data

## Article Summary

### Strengths and limitations of this study

- Combination of the National Ambulatory Care Reporting System and BC's Medical Services Plan now permits comprehensive analysis of ED visits.
- For the first time ever, mental and substance use disorder-related emergency department visits for people ages  $\geq 15$ , patient characteristics, and changes in visit rates over time, are comprehensively described in British Columbia (BC), Canada.
- This study is preliminary and descriptive, and cannot confirm causal drivers of ED visits.
- Only one diagnosis is consistently recorded in the data, even if concurrent disorders are managed during the visits.

### Declarations

**Funding:** This work was supported by the Canadian Institutes of Health Research and the Michael Smith Foundation for Health Research (Partnerships for Health System Improvement grant number FRN – 148170). The funders had no role in the design of the study or in the data analysis and interpretations, nor were they involved in the writing of the manuscript.

**Conflicts of Interest:** The authors have no relevant financial or non-financial interests to disclose. Drs. Ruth Lavergne and Joseph Puyat receive salary support from Michael Smith Foundation for Health Research Scholar Awards.

## Background

Accurately tracking emergency department (ED) visits related to mental and substance use disorders (MSUD) and understanding the characteristics of people with MSUD ED visits is important for service planning and improving healthcare systems. EDs provide highly accessible acute care [1,2] and in many cases act as an entry point for referral to other, community-based services [1]. However, unscheduled visits to care providers with little knowledge of the patient's history may limit effective patient management [1,2]. Thus, a detailed picture of who uses the ED for MSUD-related needs and an understanding of changing ED use over time is important to plan healthcare delivery, especially in the context of public health emergencies such as the ongoing overdose crisis.

In the United States, a survey of ED visits found that alcohol use disorder accounted for the greatest increase in MSUD visits between 2006 and 2015, followed by mood disorders, and anxiety disorders [3]. Over a similar time period, anxiety disorders and substance use disorders accounted for the greatest increase in MSUD ED visits in Ontario [4]. In Australia, MSUD ED visit increases were also largely driven by substance use disorders, which included alcohol use, followed by anxiety disorders and mood disorders [5]. However, Canadian research examining trends in MSUD ED visits over time outside of Ontario is limited by the fact data from the National Ambulatory Care Reporting System data is available for only a subset of EDs, and comparable data has not been available over time. Consequently, most studies focus only on people with frequent ED visits, and are cross-sectional [6–13]. MSUD ED visits have not been examined in British Columbia (BC). This information gains additional importance within the context of the overdose crisis which has disproportionately impacted BC [14,15].

The purpose of the present study is to for the first time ever 1) comprehensively describe all MSUD ED visits for people ages 15 and older in the province of BC in 2017/8, 2) describe patient characteristics by number of ED visits in 2017/8, and 3) explore changes in MSUD ED visit rates over time by disorder group (2007/8 to 2017/8).

## Methods

### *Data*

We used de-identified data holdings from the BC Ministry of Health linked [16] and made accessible through Population Data BC. Two data sources capture ED visits in BC: the National Ambulatory Care Reporting System (NACRS) [17] and BC's Medical Services Plan (MSP) payment information [18]. NACRS was developed by the Canadian Institute for Health Information to collect data on ED and other ambulatory visits. BC began reporting to NACRS in 2012 and only a subset of EDs are captured (30 of 108 hospitals providing ED care in 2017/8). MSP data captures fee-for-service payments made to physicians, and encounter claims if submitted for services provided by physicians who are paid through Alternative Payment Plans. All EDs not reporting to NACRS are captured within the MSP data; thus, we have complete data for the entire province.

We used patient registry data [19], as well as information from hospitalizations captured through the Discharge Abstract Database to describe the demographic and clinical characteristics of people with MSUD ED visits [20]. We obtained population estimates used as denominators to construct rates of ED visits from BC Statistics [21].

### *Study population*

We examined all people age 15+ with MSUD ED visits (diagnosis codes listed in Appendix 1) during the study period.

### *Patient and public involvement*

Neither patients nor the public were involved in the design, conduct, reporting, or dissemination plans of this research.

### *Setting*

The province of BC had a population of approximately 5 million people in 2018 [22]. Five geographic health authorities (Fraser, Vancouver Coastal, Interior, Northern, and Island) are responsible for planning and delivering healthcare services within their geographic areas. Most physician services (including primary care and psychiatry) are paid fee-for-service directly by the provincial health insurance plan (MSP). A public health emergency was declared in BC on April 14, 2016 in response to the opioid overdose epidemic.

### *Measures*

*MSUD ED visits:* We identified MSP claims with a service location in the ED or corresponding to fee items billed only in the ED (Appendix 1). We also extracted all ED visits to BC facilities recorded in NACRS data. To ensure visits were not double counted across sources or when multiple MSP claims were submitted for a single patient, we retained only one ED record per patient per day. Where multiple records contained different diagnoses, we retained records for MSUD.

*Demographic characteristics:* Age was obtained from BC's MSP registration file. Sex is collected at time of MSP registration. The field is labeled "Gender" on the registration form but only the binary options "M" and "F" are provided. It is not possible to distinguish sex at birth, legal sex, and gender based on this information, so we labelled this "sex/gender." Health Authority was determined based on patient residential address, not location of service use. Neighbourhood income quintile was determined based on census enumeration area of residence, assigned using the Postal Code Conversion File Plus (PCCF+) [23,24].

*Clinical characteristics:* We classified MSUD ED visits based on disorder groupings (Appendix 2). We also examined all other MSUD services in 2017/8. Patients with two outpatient visits or one hospitalization (within a 365-day period) for the disorders listed in Appendix 2 were considered to have been treated for the disorder [25].

The Charlson-Deyo Comorbidity Index categorizes diagnosis codes based on 17 weighted categories [26,27]. We presented both the Index's average weight and the percentage of people with no identified comorbidities based on both outpatient and inpatient service use.

*Health services use:* For all ED visits, we explored if people had an outpatient visit (service location office, home, or long-term care facility) with a primary care physician with an MSUD diagnosis code on the same day as the ED visit or in the preceding 30 days. We excluded visits for Opioid Agonist Treatment (OAT, fee codes 00039 and 15039). We also determined the percentage of ED visits that subsequently resulted in hospitalization. We identified involuntary



1  
2  
3 hospitalizations under BC's Mental Health Act as those in which the patient was apprehended  
4 and admitted by police and/or if forms 4, 10, 20 or 21 were on the patient's record.

5  
6 For all people seen in the ED, we examined outpatient service use in the 365 days  
7 preceding their first ED visit in 2017/8. We counted the number of primary care visits occurring  
8 in the previous year (total, for MSUD, and for OAT) and report the percentage of people with no  
9 visits. We calculated continuity of care over this period using the Continuity of Care Index  
10 (COCI). The COCI identifies the number of primary care physicians providing service to a patient  
11 and the percentage of care provided by each physician. The index ranges from 0 (all visits to  
12 different physicians/no visit) to 1 (all visits with one physician). In BC, primary care physicians  
13 can bill a \$100 fee for people with Axis 1 conditions of sufficient severity to interfere with  
14 activities of daily living. The fee requires doctors to conduct a comprehensive review of the  
15 patient's history, assess the patient, and develop a treatment and management plan [28]. We  
16 examined the proportion of people with a primary care mental health planning fee billed on  
17 their behalf in the 365 days preceding the ED visit as a marker of active management in primary  
18 care. We also examined number of outpatient visits (excluding visits with a hospital, day  
19 surgery, or ED service location code) with a psychiatrist in the preceding year and the  
20 percentage of people with no psychiatrist visits.  
21  
22  
23  
24

### 25 *Analysis*

26 Our intention was to describe the volume of services within the system and the nature  
27 of the presenting population and so we chose to report both visit-level and patient-level  
28 information using data from 2017/18. We first describe patient characteristics associated with  
29 each ED visit, stratified by the MSUD diagnosis associated with the visit. We report numbers  
30 and percentages or means and standard deviations, as appropriate, and calculated the rate of  
31 ED visits per 1,000 population by health authority and income quintile.  
32  
33

34 Next, we describe the characteristics of people by number of ED visits in 2017/8. In this  
35 analysis the unit of analysis is the individual patient. We report numbers and percentages or  
36 means and standard deviations as appropriate.  
37

38 Finally, we present ED visits per 1,000 population from 2007/8 to 2017/8, stratified by  
39 disorders presenting to ED. Only visits captured in MSP data were considered in examining  
40 trends over time as NACRS data in BC were not available before 2012. We also note that BC fee-  
41 for-service data uses a code "50B" in addition to standard ICD9 codes for anxiety and  
42 depression. For this reason, it is not possible to distinguish mood and anxiety disorders in all  
43 cases. In plotting rates over time, we present this code separately for clarity.  
44  
45

### 46 *Ethics approval*

47 This study was approved by the University of British Columbia, Providence Health Care  
48 Research Institute, and Simon Fraser University research ethics boards (REB number H17-  
49 00506). All inferences, opinions and conclusions drawn in this article are those of the authors,  
50 and do not reflect the opinions or policies of the data stewards.  
51  
52  
53

## 54 **Results**

55  
56  
57

We observed 134,063 ED visits in 2017/8 across 72,363 people in BC. In total, 35.7% of visits were for mood or anxiety disorders, 36.7% for substance use disorders, 7.6% for schizophrenia spectrum disorders, 5.4% for post-traumatic stress disorder (PTSD) and adjustment disorders, and 14.6% for other mental disorders (e.g. attention deficit/hyperactivity disorder [ADHD], eating disorders, intellectual disability, neurocognitive disorder, and personality disorders) (Table 1). We observed more visits for substance use and schizophrenia among men and more visits for mood or anxiety and for PTSD and adjustment disorders among women. More visits for other mental disorders, which include organic neurocognitive disorders, were among people age 65+.

Total visit rates were higher in the Northern and Interior Health Authorities, whereas Fraser and Vancouver Coastal Health Authorities saw higher visit rates for schizophrenia spectrum disorders (Table 1). Pronounced gradients by neighbourhood income were observed across all disorders. Rates of MSUD ED visits for people living in low-income neighbourhoods were more than double rates for people living in high-income neighbourhoods. Visits for people with substance use and schizophrenia spectrum disorders were especially high among people living in the lowest income neighbourhoods relative to the other disorders. The Charlson-Deyo index, a measure of physical comorbidities, was similar across all groups except other disorders, which also has an older age distribution.

We found that 26.6% of ED visits were preceded by a primary care visit for mental health or substance use within 30 days, and 6.1% of ED visits occurred on the same day as a separate primary care visit (Table 1). Across all disorders, approximately 22.6% of ED visits were followed by a hospital admission, of which 54% were involuntary admissions under BC's Mental Health Act. The percentage hospitalized was highest for schizophrenia spectrum and lowest for substance use disorders (for both voluntary, and involuntary hospitalizations).

Rates of MSUD ED visits are increasing over time, and are largely driven by substance use, though visits for anxiety also increased notably (Figure 1). Higher percentages of people with frequent ED visits are male (Table 2). The percentage of people living in the lowest income quintile increased with number of ED visits, as did the percentage of people with drug coverage under public Pharmacare. The percentage of people with substance use disorders and the percentage of people with two or more treated disorders increased with number of ED visits, but the Charlson-Deyo index of comorbidities was similar.

People with more ED visits also had higher mean outpatient primary care service use, but lower continuity of care with primary care providers (Table 2). People with more ED visits also had higher mean outpatient psychiatrist visits, though overall 78.4% of people with one or more ED visits did not have an outpatient psychiatrist visit in the preceding year.

## Discussion

We observe that roughly 1.5% of British Columbians ages  $\geq 15$  ( $n = 4,118,960$ ) used an emergency department for MSUD in 2017/8. As anticipated, ED visits for substance use are increasing as has been observed elsewhere [3–5], likely signalling the overdose epidemic is contributing to increasing ED visit rates for substance use [29,30]. Unmet healthcare needs, especially a lack of accessible, community-based specialist care, may also be driving these visits [31]. Additionally, people who use drugs often experience stigmatizing attitudes and inferior care in hospital settings and may consequently delay seeking treatment [32] until the severity

1  
2  
3 of their symptoms require medical attention at which point, they present to the ED [2,32–34].  
4 Increasing rates of visits for substance use in particular, likely indicate the need for linkages to  
5 other relevant treatments and services, such as intensive case management [35–37].  
6

7 Visits for anxiety are also increasing as observed elsewhere [3–5]. Increased substance  
8 use, especially within the context of the ongoing overdose crisis, may be contributing to  
9 increasing rates of ED visits for anxiety. High rates of comorbidity between substance use and  
10 anxiety within clinical and population samples are well established [38]. Symptoms of both  
11 substance use and substance use withdrawal can mimic anxiety symptoms [38,39] and may be  
12 treated as anxiety. Others have noted that the prevalence of anxiety disorders has remained  
13 stable, while the prevalence of psychological distress is increasing, which may indicate  
14 psychological distress is being treated as anxiety [40].  
15

16 We found people with more frequent ED visits also have higher use of outpatient  
17 services, indicating that existing community-based services are not meeting people's healthcare  
18 needs. Pronounced income gradients reflect the association between socioeconomic status and  
19 mental illness but may also suggest that EDs play a particularly important role as an access  
20 point for people living with low incomes (as indicated by low-income neighbourhoods and  
21 receiving drug coverage under public Pharmacare). This is consistent with patterns observed in  
22 cross-provincial Canadian data [41] and elsewhere [2,6,34,42,43]. The fact that people with  
23 more frequent visits had lower continuity of care may suggest gaps in coordination and  
24 integration of outpatient services, corroborating previous research [9,44–46].  
25

26 In the context of COVID-19, the ability to track MSUD service use, and highlight potential  
27 gaps, gains additional significance. Our methods may be useful to other researchers seeking to  
28 track changing patterns of ED service use.  
29  
30  
31

### 32 *Limitations*

33 This study relied on administrative data and is preliminary and descriptive, and thus,  
34 subject to several important limitations. Trends in diagnoses over time are based on MSP data  
35 only. The subset of facilities where fee-for-service claims are not submitted may differ in  
36 disorders seen and possibly also in changes over time. Only one diagnosis is consistently  
37 recorded in fee-for-service and NACRS data, even if concurrent disorders are managed during  
38 the visits. We cannot confirm causal drivers of increasing rates of ED visits for substance use  
39 and anxiety.  
40  
41  
42

### 43 **Conclusion**

44 The use of ED services for mental and substance use disorders is substantial and  
45 growing in BC. While substance use largely accounts for increasing rates over time, visits for  
46 anxiety and other conditions are also increasing. Findings signal a need to strengthen and target  
47 community healthcare services for potentially underserved groups and an opportunity to triage  
48 people with MSUD to appropriate care.  
49  
50  
51  
52  
53  
54  
55  
56  
57

1  
2  
3 **Author's Contributions:** Ruth Lavergne planned all analysis and led drafting of the manuscript.  
4 Mehdi Shirmaleki conducted analysis of linked data, including development of methods for  
5 capturing ED visits. Jackson Loyal contributed to conception of the paper and literature review.  
6 Wayne Jones, Tonia Nicholls, Christian Schütz, Adam Vaughan, Hasina Samji, Joseph Puyat,  
7 Ridhwana Kaoser, and Megan Kaulius all contributed to planning analysis, interpreting findings,  
8 and made critical revisions to the manuscript. Will Small oversaw all aspects of this study and  
9 assisted in interpretation of findings. All authors approve this version of the paper and agree to  
10 act as guarantors of this research.  
11  
12

13  
14 **Availability of data and material:** Linked, de-identified data holdings from the BC Ministry of  
15 Health linked and made accessible through Population Data BC were used for analysis. We are  
16 not permitted to share the research extract used in this analysis with other researchers, but all  
17 data are available through Population Data BC. All inferences, opinions and conclusions drawn  
18 in this article are those of the authors, and do not reflect the opinions or policies of the data  
19 stewards.  
20  
21

#### 22 **Figure caption**

23 **Figure 1.** Rates of emergency department visits for mental and substance use disorders over  
24 time by diagnosis assigned to visit (physician claims only)  
25  
26  
27  
28  
29  
30  
31  
32  
33  
34  
35  
36  
37  
38  
39  
40  
41  
42  
43  
44  
45  
46  
47  
48  
49  
50  
51  
52  
53  
54  
55  
56  
57  
58  
59  
60

## References

1. Wise-Harris D, Pauly D, Kahan D, et al. "Hospital was the only option": Experiences of frequent emergency department users in mental health. *Adm Policy Ment Health*. Available from: 2017;44(3):405–412. doi:10.1007/s10488-016-0728-3
2. Fleury M-J, Grenier G, Farand Let al. Use of emergency rooms for mental health reasons in Quebec: Barriers and facilitators. *Adm Policy Ment Health*. 2019;46(1):18–33. Available from:doi:10.1007/s10488-018-0889-3
3. Nam E, Lee E, Kim H. 10-year trends of emergency department visits, wait time, and length of stay among adults with mental health and substance use disorders in the United States. *Psychiatr Q*. 2021;1-16. Available from: doi:10.1007/s11126-021-09894-y
4. Chiu M, Gatov E, Vigod SN, et al. Temporal trends in mental health service utilization across outpatient and acute care sectors: A population-based study from 2006 to 2014. *Can J Psychiatry*. 2018;63(2):94–102. Available from:doi:10.1177/0706743717748926
5. Tran QN, Lambeth LG, Sanderson K, et al. Trend of emergency department presentations with a mental health diagnosis in Australia by diagnostic group, 2004–05 to 2016–17. *Emerg Med Australas*. 2020;32(2):190–201. Available from: doi:10.1111/1742-6723.13451
6. Doupe MB, Palatnick W, Day S, et al. Frequent users of emergency departments: Developing standard definitions and defining prominent risk factors. *Ann Emerg Med*. 2012;60(1):24–32. Available from: doi:10.1016/j.annemergmed.2011.11.036
7. Kendall CE, Boucher LM, Mark AE, et al. A cohort study examining emergency department visits and hospital admissions among people who use drugs in Ottawa, Canada. *Harm Reduct J*. 2017;14(1):16. Available from: doi:10.1186/s12954-017-0143-4
8. Vandyk AD, Harrison MB, VanDenKerkhof EG, et al. Frequent emergency department use by individuals seeking mental healthcare: A systematic search and review. *Arch Psychiatr Nurs*. 2013;27(4):171–178. Available from: doi:10.1016/j.apnu.2013.03.001
9. Colligan EM, Pines JM, Colantuoni E, et al. Factors associated with frequent emergency department use in the medicare population. *Med Care Res Rev*. 2017;74(3):311–327. Available from: doi:10.1177/1077558716641826
10. Hynie M, Ardern CI, Robertson A. Emergency room visits by uninsured child and adult residents in Ontario, Canada: What diagnoses, severity and visit disposition reveal about the impact of being uninsured. *J Immigr and Minor Health*. 2016;18(5):948–956. Available from: doi:10.1007/s10903-016-0351-0
11. Chambers C, Chiu S, Katic M, et al. High utilizers of emergency health services in a population-based cohort of homeless adults. *Am J Public Health*. 2013;103(S2):S302–S310. Available from: doi:10.2105/AJPH.2013.301397

12. Newton AS, Rosychuk RJ, Dong K, et al. Emergency health care use and follow-up among sociodemographic groups of children who visit emergency departments for mental health crises. *CMAJ*. 2012;184(12):E665–E674. Available from: doi:10.1503/cmaj.111697
13. Saunders NR, Gill PJ, Holder L, et al. Use of the emergency department as a first point of contact for mental health care by immigrant youth in Canada: A population-based study. *CMAJ*. 2018;190(40):E1183–E1191. Available from: doi:10.1503/cmaj.180277
14. Krausz RM, Westenberg JN, Ziafat K. The opioid overdose crisis as a global health challenge. *Curr Opin Psychiatry*. 2021;34(4):405–412. doi:10.1097/YCO.0000000000000712
15. Belzak L, Halverson J. Evidence synthesis - The opioid crisis in Canada: a national perspective. *Health Promot Chronic Dis Prev Can*. 2018;38(6):224–233. Available from: doi:10.24095/hpcdp.38.6.02
16. Population Data BC. (n.d.). The data linkage process. Retrieved from <https://www.popdata.bc.ca/datalinkage/process>
17. Canadian Institute for Health Information. National ambulatory care reporting system metadata (NACRS), 2017-2018. Population Data BC; 2019. Available from: <http://www.popdata.bc.ca/data>
18. British Columbia Ministry of Health. Medical services plan (MSP) payment information file. Population Data BC; 2019. Available from: <http://www.popdata.bc.ca/data>
19. British Columbia Ministry of Health. Consolidation File (MSP Registration & Premium Billing). Population Data BC; 2018. Available from: <http://www.popdata.bc.ca/data>
20. Canadian Institute for Health Information. Discharge Abstract Database. Population Data BC; 2018. Available from: <http://www.popdata.bc.ca/data>
21. British Columbia Statistics. Sub-provincial population projections - P.E.O.P.L.E. 2018. <https://www.bcstats.gov.bc.ca/apps/PopulationProjections.aspx>
22. British Columbia Statistics. British Columbia Population Estimates: Annual Population, July 1, 1867-2019. 2021. Available from: [https://www2.gov.bc.ca/assets/gov/data/statistics/people-population-community/population/pop\\_bc\\_annual\\_estimates.csv](https://www2.gov.bc.ca/assets/gov/data/statistics/people-population-community/population/pop_bc_annual_estimates.csv)
23. Wilkins R. Use of postal codes and addresses in the analysis of health data. *Health Rep*. 1993;5(2):157.
24. Wilkins R. Automated Geographic Coding Based on the Statistics Canada Postal Code Conversion Files, Including Postal Codes through March 2009. Ottawa: Analysis Division, Statistics Canada; 2009.



- 1  
2  
3 25. Jones W, Kaoser R, Samji H, et al. Identifying mental and substance use disorders using  
4 administrative data. Centre for Applied Research in Mental Health and Addictions; 2020.  
5  
6  
7 26. Deyo RA, Cherkin DC, Ciol MA. Adapting a Clinical Comorbidity Index for Use with ICD-9-CM  
8 Administrative Databases. *J Clin Epidemiol.* 1992;45:613–9.  
9  
10 27. Quan H, Sundararajan V, Halfon P et al. Coding algorithms for defining comorbidities in ICD-  
11 9-CM and ICD-10 administrative data: *Med Care.* 2005;43(11):1130–1139. Available from:  
12 doi:10.1097/01.mlr.0000182534.19832.83  
13  
14 28. Doctors of British Columbia. Mental Health Fees. 2020. Available from:  
15 <https://gpscbc.ca/sites/default/files/uploads/GPSC-Mental-Health-Billing-Guide-20210101.pdf>  
16  
17  
18 29. Moe J, Camargo CA, Jelinski S, et al. Epidemiologic trends in substance and opioid misuse-  
19 related emergency department visits in Alberta: A cross-sectional time-series analysis. *Can J*  
20 *Public Health.* 2018;109(2):164–173. Available from: doi:10.17269/s41997-018-0053-6  
21  
22 30. Tedesco D, Asch SM, Curtin C, et al. Opioid abuse and poisoning: Trends In inpatient and  
23 emergency department discharges. *Health Aff.* 2017;36(10):1748–1753. Available from:  
24 doi:10.1377/hlthaff.2017.0260  
25  
26 31. Urbanoski K, Inglis D, Veldhuizen S. Service use and unmet needs for substance use and  
27 mental disorders in Canada. *Can J Psychiatry.* 2017;62(8):551–559. Available from:  
28 doi:10.1177/0706743717714467  
29  
30 32. Chan Carusone S, Guta A, Robinson S, et al. “Maybe if I stop the drugs, then maybe they’d  
31 care?”—hospital care experiences of people who use drugs. *Harm Reduct J.* 2019;16(1):16.  
32 Available from: doi:10.1186/s12954-019-0285-7  
33  
34 33. Vandyk AD, Young L, MacPhee C, et al. Exploring the experiences of persons who frequently  
35 visit the emergency department for mental health-related reasons. *Qual Health Res.*  
36 2018;28(4):587–599. Available from: doi:10.1177/1049732317746382  
37  
38 34. Clarke DE, Dusome D, Hughes L. Emergency department from the mental health client’s  
39 perspective. *Int J Ment Health Nurs.* 2007;16(2):126–131. Available from: doi:10.1111/j.1447-  
40 0349.2007.00455.x  
41  
42 35. Niedzwiecki MJ, Sharma PJ, Kanzaria HK, et al. Factors associated with emergency  
43 department use by patients with and without mental health diagnoses. *JAMA Netw Open.*  
44 2018;1(6):e183528. Available from: doi:10.1001/jamanetworkopen.2018.3528  
45  
46 36. Althaus F, Paroz S, Hugli O, et al. Effectiveness of interventions targeting frequent users of  
47 emergency departments: A systematic review. *Ann Emerg Med.* 2011;58(1):41-52.e42.  
48 Available from: doi:10.1016/j.annemergmed.2011.03.007  
49  
50  
51  
52  
53  
54  
55  
56  
57  
58  
59  
60

- 1  
2  
3 37. Grover CA, Villarreal K, Goldman LM. Emergency department frequent user: pilot study of  
4 intensive case management to reduce visits and computed tomography. *West J Emerg Med.*  
5 2010;(4):8.  
6  
7  
8 38. Grant BF, Stinson FS, Dawson DA, et al. Prevalence and co-occurrence of substance use  
9 disorders and independent mood and anxiety disorders: Results from the National  
10 Epidemiologic Survey on Alcohol and Related Conditions. *Arch Gen Psychiatry.* 2004;61:807–  
11 816.  
12  
13  
14 39. Vorspan F, Mehtelli W, Dupuy G, et al. Anxiety and substance use disorders: Co-occurrence  
15 and clinical issues. *Curr Psychiatry Rep.* 2015;17(2):4. Available from: doi:10.1007/s11920-014-  
16 0544-y  
17  
18 40. Baxter AJ, Scott KM, Ferrari AJ, Norman RE, Vos T, Whiteford HA. Challenging the myth of an  
19 “epidemic” of common mental disorders: Trends in the global prevalence of anxiety and  
20 depression between 1990 and 2010: *Depress Anxiety.* 2014;31:506–16.  
21  
22  
23 41. Canadian Institute for Health Information. Common Challenges, Shared Priorities:  
24 Measuring Access to Home and Community Care and to Mental Health and Addictions Services  
25 in Canada. Ottawa, ON: CIHI; 2019.  
26  
27  
28 42. Urbanoski K, Cheng J, Rehm J, et al. Frequent use of emergency departments for mental and  
29 substance use disorders. *Emerg Med J.* 2018;35(4):220–225. Available from:  
30 doi:10.1136/emered-2015-205554  
31  
32 43. Fleury M-J, Grenier G, Bamvita J-M, et al. Typology of patients who use emergency  
33 departments for mental and substance use disorders. *BJPsych Open.* 2020;6(4):e59. Available  
34 from: doi:10.1192/bjo.2020.39  
35  
36  
37 44. Marshall EG, Clarke B, Burge F, et al. Improving continuity of care reduces emergency  
38 department visits by long-term care residents. *J Am Board Fam Med.* 2016;29(2):201–208.  
39 Available from: doi:10.3122/jabfm.2016.12.150309  
40  
41  
42 45. McCusker J, Tousignant P, Silva RBD, et al. Factors predicting patient use of the emergency  
43 department: A retrospective cohort study. *CMAJ.* 2012;184(6):E307–E316. Available from:  
44 doi:10.1503/cmaj.111069  
45  
46 46. Ionescu-Ittu R, McCusker J, Ciampi A, et al. Continuity of primary care and emergency  
47 department utilization among elderly people. *CMAJ.* 2007;177(11):1362–1368. Available from:  
48 doi:10.1503/cmaj.061615  
49  
50  
51  
52  
53  
54  
55  
56  
57  
58  
59  
60



**Table 1.** Emergency department visits for mental and substance use disorders in British Columbia (2017/8) by individual characteristics and discharge diagnosis

|                                                     | Mood and Anxiety |         | Substance Use |         | Schizophrenia spectrum |         | PTSD and adjustment |         | Other Mental |         | Total   |          |
|-----------------------------------------------------|------------------|---------|---------------|---------|------------------------|---------|---------------------|---------|--------------|---------|---------|----------|
| Total Visits, n (%)                                 | 47,881           | (35.7%) | 49,164        | (36.7%) | 10,219                 | (7.6%)  | 7,236               | (5.4%)  | 19,563       | (14.6%) | 134,063 | (100.0%) |
| <b>Sex</b>                                          |                  |         |               |         |                        |         |                     |         |              |         |         |          |
| Female                                              | 26,775           | (55.9%) | 15,865        | (32.3%) | 3,585                  | (35.1%) | 3,896               | (53.8%) | 9,720        | (49.7%) | 59,841  | (44.6%)  |
| Male                                                | 21,106           | (44.1%) | 33,299        | (67.7%) | 6,634                  | (64.9%) | 3,340               | (46.2%) | 9,838        | (50.3%) | 74,217  | (55.4%)  |
| Unknown                                             | 0                |         | 0             |         | 0                      |         | 0                   |         | 5            |         | 5       |          |
| <b>Age</b>                                          |                  |         |               |         |                        |         |                     |         |              |         |         |          |
| 15-24                                               | 12,430           | (26.0%) | 7,582         | (15.4%) | 1,526                  | (14.9%) | 2,183               | (30.2%) | 3,019        | (15.4%) | 26,740  | (19.9%)  |
| 25-44                                               | 17,740           | (37.1%) | 22,142        | (45.0%) | 4,899                  | (47.9%) | 2,596               | (35.9%) | 5,076        | (25.9%) | 52,453  | (39.1%)  |
| 45-64                                               | 11,922           | (24.9%) | 16,328        | (33.2%) | 3,069                  | (30.0%) | 1,734               | (24.0%) | 3,790        | (19.4%) | 36,843  | (27.5%)  |
| 65+                                                 | 5,789            | (12.1%) | 3,112         | (6.3%)  | 725                    | (7.1%)  | 723                 | (10.0%) | 7,678        | (39.2%) | 18,027  | (13.4%)  |
| <b>Health Authority (rate per 1,000 population)</b> |                  |         |               |         |                        |         |                     |         |              |         |         |          |
| Interior                                            | 8,684            | (13.3)  | 10,124        | (15.5)  | 918                    | (1.4)   | 1,435               | (2.2)   | 2,683        | (4.1)   | 23,844  | (36.5)   |
| Fraser                                              | 18,948           | (12.6)  | 16,812        | (11.2)  | 4,759                  | (3.2)   | 2,665               | (1.8)   | 7,518        | (5.0)   | 50,702  | (33.7)   |
| Vancouver Coastal                                   | 7,479            | (7.2)   | 11,252        | (10.8)  | 3,019                  | (2.9)   | 997                 | (1.0)   | 4,740        | (4.5)   | 27,487  | (26.4)   |
| Vancouver Island                                    | 8,412            | (12.2)  | 7,219         | (10.5)  | 1,045                  | (1.5)   | 1,275               | (1.9)   | 3,613        | (5.2)   | 21,564  | (31.3)   |
| Northern                                            | 4,315            | (18.9)  | 3,638         | (16.0)  | 457                    | (2.0)   | 862                 | (3.8)   | 989          | (4.3)   | 10,261  | (45.1)   |
| Missing HA                                          | 43               |         | 119           |         | 21                     |         |                     |         | 20           |         | 205     |          |
| <b>Income quintile (rate per 1,000 population)</b>  |                  |         |               |         |                        |         |                     |         |              |         |         |          |
| Q1 (lowest)                                         | 13,113           | (14.7)  | 17,818        | (20.0)  | 3,972                  | (4.5)   | 2,122               | (2.4)   | 5,979        | (6.7)   | 43,004  | (48.2)   |
| Q2                                                  | 10,048           | (13.2)  | 10,124        | (13.3)  | 2,185                  | (2.9)   | 1,619               | (2.1)   | 3,995        | (5.2)   | 27,971  | (36.7)   |
| Q3                                                  | 8,988            | (11.3)  | 7,732         | (9.8)   | 1,602                  | (2.0)   | 1,277               | (1.6)   | 3,536        | (4.5)   | 23,135  | (29.2)   |
| Q4                                                  | 8,237            | (10.0)  | 6,992         | (8.5)   | 1,251                  | (1.5)   | 1,155               | (1.4)   | 3,130        | (3.8)   | 20,765  | (25.1)   |
| Q5 (highest)                                        | 6,786            | (8.0)   | 4,944         | (5.8)   | 985                    | (1.2)   | 907                 | (1.1)   | 2,539        | (3.0)   | 16,161  | (19.1)   |
| Missing Income                                      | 709              |         | 1,554         |         | 224                    |         | 156                 |         | 384          |         | 3,027   |          |
| <b>Comorbidities</b>                                |                  |         |               |         |                        |         |                     |         |              |         |         |          |
| Charlson-Deyo weighted index (mean, SD)             | 0.7              | ± 1.5   | 0.8           | ± 1.7   | 0.7                    | ± 1.5   | 0.7                 | ± 1.5   | 1.7          | ± 2.4   | 0.9     | ± 1.8    |

|                                                  |        |         |        |         |       |         |       |         |       |         |        |         |
|--------------------------------------------------|--------|---------|--------|---------|-------|---------|-------|---------|-------|---------|--------|---------|
| No Charlson-Deyo diagnoses                       | 33,139 | (69.2%) | 32,239 | (65.6%) | 6,558 | (64.2%) | 5,084 | (70.3%) | 8,253 | (42.2%) | 85,273 | (63.6%) |
| <b>Service use before and after ED</b>           |        |         |        |         |       |         |       |         |       |         |        |         |
| MSUD primary care visit within preceding 30 days | 13,764 | (28.7%) | 13,387 | (27.2%) | 2,226 | (21.8%) | 1,695 | (23.4%) | 4,554 | (23.3%) | 35,626 | (26.6%) |
| MSUD primary care visit on same day as ED visit  | 3,252  | (6.8%)  | 2,890  | (5.9%)  | 520   | (5.1%)  | 384   | (5.3%)  | 1,172 | (6.0%)  | 8,218  | (6.1%)  |
| Hospital admission on same or next day           | 10,188 | (21.3%) | 6,428  | (13.1%) | 4,531 | (44.3%) | 1,474 | (20.4%) | 7,634 | (39.0%) | 30,255 | (22.6%) |
| Involuntary admission on same or next day        | 6,464  | (13.5%) | 2,093  | (4.3%)  | 3,767 | (36.9%) | 749   | (10.4%) | 3,239 | (16.6%) | 16,312 | (12.2%) |

**Table 2.** Individual characteristics by number of MSUD ED visits 2017/8. N(%) except where indicated.

|                                               | 1 ED visit |         | 2-5 ED visits |         | 6-11 ED visits |         | 12+ ED visits |         | All people |          |
|-----------------------------------------------|------------|---------|---------------|---------|----------------|---------|---------------|---------|------------|----------|
| Total                                         | 50,107     | (69.2%) | 19,353        | (26.7%) | 2,138          | (3.0%)  | 765           | (1.1%)  | 72,363     | (100.0%) |
| <b>Sex</b>                                    |            |         |               |         |                |         |               |         |            |          |
| Female                                        | 24,958     | (49.8%) | 8,851         | (45.7%) | 834            | (39.0%) | 268           | (35.0%) | 34,911     | (48.2%)  |
| Male                                          | 25,149     | (50.2%) | 10,502        | (54.3%) | 1,304          | (61.0%) | 497           | (65.0%) | 37,450     | (51.8%)  |
| <b>Age</b>                                    |            |         |               |         |                |         |               |         |            |          |
| 15_24                                         | 11,169     | (22.3%) | 4,326         | (22.4%) | 377            | (17.6%) | 105           | (13.7%) | 15,977     | (22.1%)  |
| 25_44                                         | 16,625     | (33.2%) | 7,486         | (38.7%) | 981            | (45.9%) | 373           | (48.8%) | 25,465     | (35.2%)  |
| 45_64                                         | 12,337     | (24.6%) | 5,073         | (26.2%) | 639            | (29.9%) | 253           | (33.1%) | 18,302     | (25.3%)  |
| 65+                                           | 9,976      | (19.9%) | 2,468         | (12.8%) | 141            | (6.6%)  | 34            | (4.4%)  | 12,619     | (17.4%)  |
| <b>Health Authority</b>                       |            |         |               |         |                |         |               |         |            |          |
| Interior                                      | 8,797      | (17.6%) | 2,884         | (14.9%) | 257            | (12.0%) | 198           | (25.9%) | 12,136     | (16.8%)  |
| Fraser                                        | 17,801     | (35.5%) | 7,706         | (39.8%) | 926            | (43.3%) | 266           | (34.8%) | 26,699     | (36.9%)  |
| Vancouver Coastal                             | 10,005     | (20.0%) | 3,916         | (20.2%) | 481            | (22.5%) | 175           | (22.9%) | 14,577     | (20.1%)  |
| Vancouver Island                              | 8,969      | (17.9%) | 3,245         | (16.8%) | 324            | (15.2%) | 88            | (11.5%) | 12,626     | (17.4%)  |
| Northern                                      | 4,409      | (8.8%)  | 1,577         | (8.1%)  | 147            | (6.9%)  | 38            | (5.0%)  | 6,171      | (8.5%)   |
| Missing                                       | 126        | (0.3%)  | 25            | (0.1%)  |                | (0.0%)  |               | (0.0%)  | 154        | (0.2%)   |
| <b>Rurality</b>                               |            |         |               |         |                |         |               |         |            |          |
| Metropolitan                                  | 30,734     | (61.3%) | 12,286        | (63.5%) | 1,456          | (68.1%) | 587           | (76.7%) | 45,063     | (62.3%)  |
| Small urban                                   | 11,648     | (23.2%) | 4,385         | (22.7%) | 449            | (21.0%) | 110           | (14.4%) | 16,592     | (22.9%)  |
| Rural/remote                                  | 7,595      | (15.2%) | 2,655         | (13.7%) | 229            | (10.7%) | 68            | (8.9%)  | 10,547     | (14.6%)  |
| Unknown                                       | 39         | (0.1%)  | 7             | (0.0%)  |                | (0.0%)  |               | (0.0%)  | 47         | (0.1%)   |
| <b>Neighbourhood income quintile</b>          |            |         |               |         |                |         |               |         |            |          |
| Q1 (lowest)                                   | 13,794     | (27.5%) | 6,158         | (31.8%) | 797            | (37.3%) | 306           | (40.0%) | 21,055     | (29.1%)  |
| Q2                                            | 10,377     | (20.7%) | 3,994         | (20.6%) | 449            | (21.0%) | 162           | (21.2%) | 14,982     | (20.7%)  |
| Q3                                            | 9,273      | (18.5%) | 3,403         | (17.6%) | 345            | (16.1%) | 111           | (14.5%) | 13,132     | (18.1%)  |
| Q4                                            | 8,610      | (17.2%) | 3,029         | (15.7%) | 282            | (13.2%) | 93            | (12.2%) | 12,014     | (16.6%)  |
| Q5 (highest)                                  | 7,088      | (14.1%) | 2,341         | (12.1%) | 202            | (9.4%)  | 69            | (9.0%)  | 9,700      | (13.4%)  |
| Missing                                       | 965        | (1.9%)  | 428           | (2.2%)  | 63             | (2.9%)  | 24            | (3.1%)  | 1,480      | (2.0%)   |
| <b>Prescription drug plan (BC Pharmacare)</b> |            |         |               |         |                |         |               |         |            |          |

|                                                                                |        |         |        |         |       |         |      |         |        |         |
|--------------------------------------------------------------------------------|--------|---------|--------|---------|-------|---------|------|---------|--------|---------|
| Plan C (income assistance)                                                     | 9,939  | (19.8%) | 7,012  | (36.2%) | 1,232 | (57.6%) | 494  | (64.6%) | 18,677 | (25.8%) |
| Plan G (psychiatric medications))                                              | 4,234  | (8.4%)  | 3,543  | (18.3%) | 476   | (22.3%) | 168  | (22.0%) | 8,421  | (11.6%) |
| <b>Treated disorders</b>                                                       |        |         |        |         |       |         |      |         |        |         |
| Mood and anxiety                                                               | 20,611 | (41.1%) | 12,804 | (66.2%) | 1,632 | (76.3%) | 493  | (64.4%) | 35,540 | (49.1%) |
| Substance use                                                                  | 9,102  | (18.2%) | 9,423  | (48.7%) | 1,642 | (76.8%) | 680  | (88.9%) | 20,847 | (28.8%) |
| Schizophrenia spectrum                                                         | 3,159  | (6.3%)  | 4,331  | (22.4%) | 899   | (42.0%) | 281  | (36.7%) | 8,670  | (12.0%) |
| PTSD and adjustment                                                            | 3,439  | (6.9%)  | 3,177  | (16.4%) | 529   | (24.7%) | 219  | (28.6%) | 7,364  | (10.2%) |
| Other                                                                          | 7,085  | (14.1%) | 4,427  | (22.9%) | 849   | (39.7%) | 304  | (39.7%) | 12,665 | (17.5%) |
| Two or more treated disorders                                                  | 10,058 | (20.1%) | 10,517 | (54.3%) | 1,755 | (82.1%) | 561  | (73.3%) | 22,891 | (31.6%) |
| <b>Physical comorbidities</b>                                                  |        |         |        |         |       |         |      |         |        |         |
| Charlson-Deyo weighted index (mean, SD)                                        | 0.9    | ± 1.8   | 0.8    | ± 1.7   | 0.9   | ± 1.7   | 1.0  | ± 1.8   | 0.9    | ± 1.8   |
| No Charlson-Deyo diagnoses                                                     | 32,815 | (65.5%) | 12,716 | (65.7%) | 1,261 | (59.0%) | 435  | (56.9%) | 47,227 | (65.3%) |
| <b>Outpatient service use (in 365 days preceding first ED visit in 2017/8)</b> |        |         |        |         |       |         |      |         |        |         |
| Primary care visits, excluding OAT (mean, SD)                                  | 8.2    | ±9.0    | 8.8    | ± 9.7   | 9.6   | ± 10.5  | 9.9  | ± 11.9  | 8.4    | ± 9.3   |
| No primary care visits (N, %)                                                  | 6,761  | (13.5%) | 2,588  | (13.4%) | 282   | (13.2%) | 107  | (14.0%) | 9,738  | (13.5%) |
| MSUD primary care visits, excluding methadone (mean, SD)                       | 1.8    | ± 3.5   | 2.8    | ± 4.3   | 3.7   | ± 5.3   | 4.1  | ± 6.1   | 2.1    | ± 3.9   |
| No MSUD primary care visit (N, %)                                              | 26,511 | (52.9%) | 7,762  | (40.1%) | 660   | (30.9%) | 239  | (31.2%) | 35,172 | (48.6%) |
| OAT visits (mean, SD)                                                          | 1.1    | ± 7.2   | 1.8    | ± 8.8   | 2.5   | ± 10.2  | 3.5  | ± 11.8  | 1.4    | ± 7.9   |
| No OAT visits (N, %)                                                           | 48,370 | (96.5%) | 18,187 | (94.0%) | 1,943 | (90.9%) | 592  | (77.4%) | 69,092 | (95.5%) |
| Continuity of care index (mean, SD)                                            | 0.43   | ± 0.38  | 0.41   | ± 0.37  | 0.36  | ± 0.35  | 0.36 | ± 0.35  | 0.42   | ± 0.38  |
| Primary care management fee billed                                             | 3,400  | (6.8%)  | 1,704  | (8.8%)  | 204   | (9.5%)  | 69   | (9.0%)  | 5,377  | (7.4%)  |
| Outpatient psychiatrist visits (mean, SD)                                      | 1.1    | ± 4.4   | 2.2    | ± 6.1   | 3.8   | ± 8.5   | 3.5  | ± 9.2   | 1.5    | ± 5.2   |
| No outpatient psychiatrist visit (N, %)                                        | 41,704 | (83.2%) | 13,345 | (69.0%) | 1,176 | (55.0%) | 477  | (62.4%) | 56,702 | (78.4%) |

\*The categories "missing" and "male" were combined in this table so as not to disclose cell sizes with fewer than five individuals

1  
2  
3  
4  
5  
6  
7  
8  
9  
10  
11  
12  
13  
14  
15  
16  
17  
18  
19  
20  
21  
22  
23  
24  
25  
26  
27  
28  
29  
30  
31  
32  
33  
34  
35  
36  
37  
38  
39  
40  
41  
42  
43  
44  
45  
46  
47

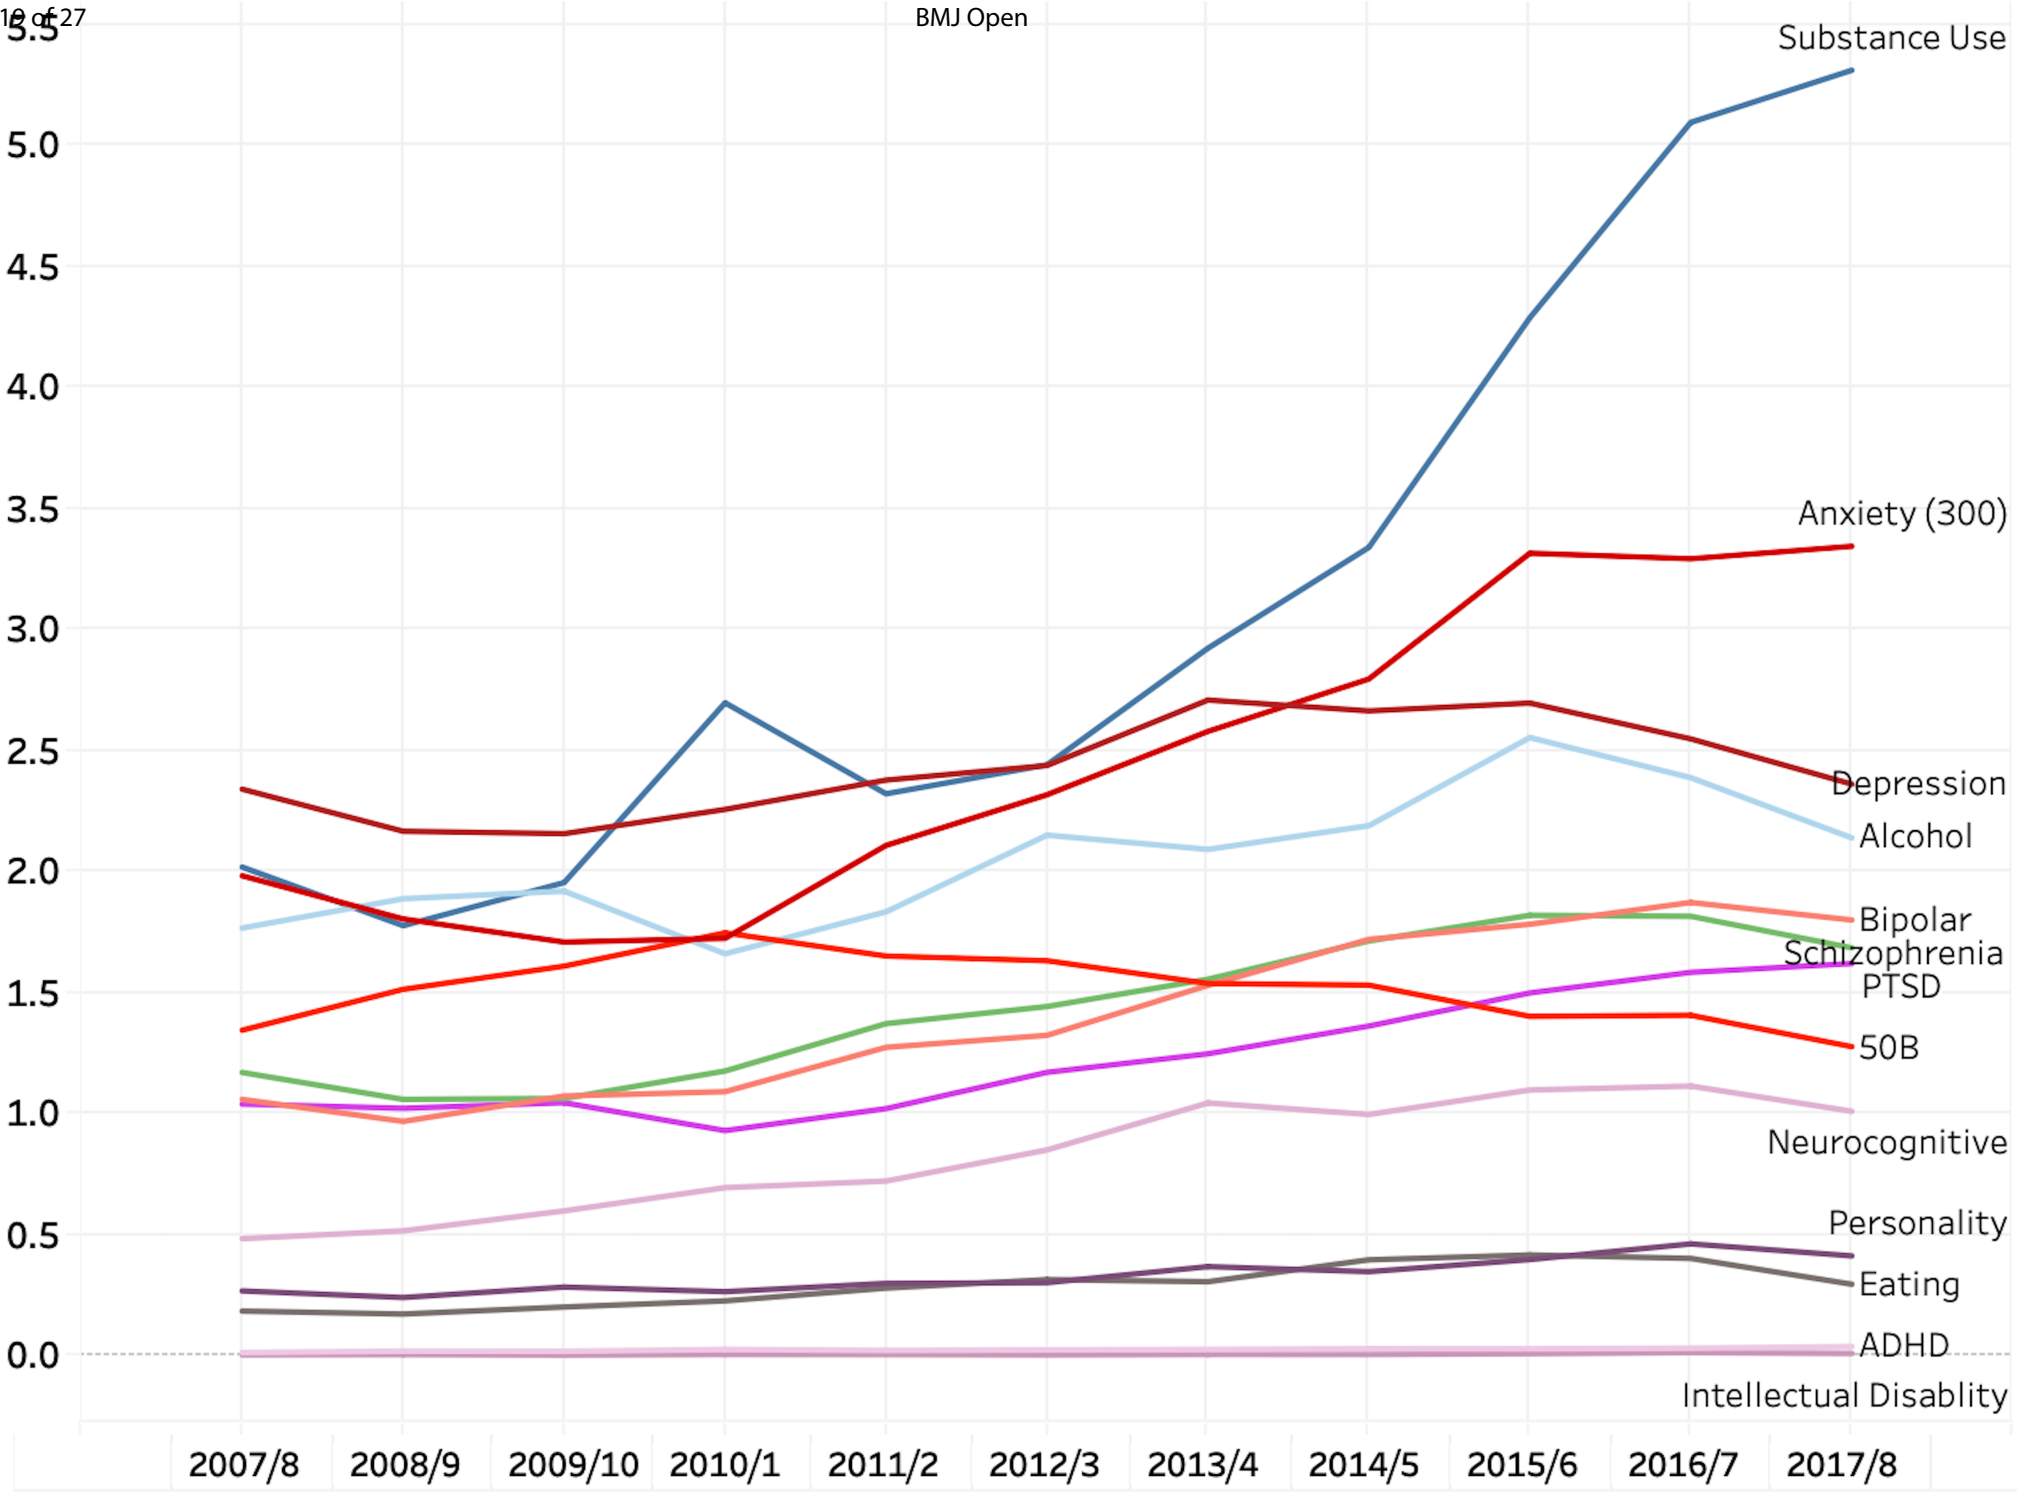

**Appendix 1.** List of fee codes included in identification of ED visits using Medical Services Plan  
Payment data

| <b>FEE ITEM</b> | <b>DESCRIPTION</b>                                        |
|-----------------|-----------------------------------------------------------|
| 1811            | LEVEL I EMERGENCY CARE - DAY                              |
| 1812            | 01812 LEVEL II EMERGENCY CARE - DAY                       |
| 1813            | 01813 LEVEL III EMERGENCY CARE - DAY                      |
| 1821            | 01821 LEVEL I EMERGENCY CARE - EVENING                    |
| 1822            | 01822 LEVEL II EMERGENCY CARE - EVENING                   |
| 1823            | 01823 LEVEL III EMERGENCY CARE - EVENING                  |
| 1831            | 01831 LEVEL I EMERGENCY CARE - NIGHT                      |
| 1832            | 01832 LEVEL II EMERGENCY CARE - NIGHT                     |
| 1833            | 01833 LEVEL III EMERGENCY CARE - NIGHT                    |
| 1841            | 01841 LEVEL I EMERGENCY CARE - SAT, SUN, OR STAT HOL      |
| 1842            | 01841 LEVEL I EMERGENCY CARE - SAT, SUN, OR STAT HOL      |
| 1843            | 01841 LEVEL I EMERGENCY CARE - SAT, SUN, OR STAT HOL      |
| 96801           | 96801 APB-LEVEL I EMERGENCY CARE DAY                      |
| 96802           | 96802 APB - LEVEL 2 EMERGENCY CARE - DAY                  |
| 96803           | 96803 APB - LEVEL 3 EMERGENCY CARE - DAY                  |
| 96804           | 96804 APB- LEVEL 4 EMERGENCY CARE - DAY                   |
| 96805           | 96805 APB - LEVEL 5 EMERGENCY CARE - DAY                  |
| 96811           | 96811 APB-LEVEL I EMERGENCY CARE - EVENING                |
| 96812           | 96812 APB - LEVEL 2 EMERGENCY CARE - EVENING              |
| 96813           | 96813 APP - LEVEL 3 EMERGENCY CARE - EVENING              |
| 96814           | 96814 APB - LEVEL 4 EMERGENCY CARE - EVENING              |
| 96815           | 96815 APB - LEVEL 5 EMERGENCY CARE - EVENING              |
| 96821           | 96821 APB - LEVEL 1 EMERGENCY CARE - NIGHT                |
| 96822           | 96822 APB - LEVEL 2 EMERGENCY CARE - NIGHT                |
| 96823           | 96823 APB -LEVEL 3 EMERGENCY CARE - NIGHT                 |
| 96824           | 96824 APB - LEVEL 4 EMERGENCY CARE - NIGHT                |
| 96825           | 96825 APB - LEVEL 5 EMERGENCY CARE - NIGHT                |
| 36347           | 36347 NP - VISIT, EMERGENCY (BETWEEN 0800 AND 1800 HRS)   |
| 36440           | 36440 NP - SIMPLE/FASTRACK VISIT IN EMERGENCY (AGE 50-59) |
| 36441           | 36441 NP - EMERGENCY DEPARTMENT VISIT (AGE 50-59)         |
| 36447           | 36447 NP - SIMPLE/FASTRACK VISIT IN EMERGENCY (AGE 2-19)  |
| 36448           | 36448 NP - EMERGENCY DEPARTMENT VISIT (AGE 2-19)          |
| 36601           | 36601 NP - SIMPLE/FASTRACK VISIT IN EMERGENCY (AGE 0-1)   |
| 36602           | 36602 NP - SIMPLE/FASTRACK VISIT IN EMERGENCY (AGE 2-59)  |
| 36603           | 36603 NP - SIMPLE/FASTRACK VISIT IN EMERGENCY (AGE 60-69) |
| 36604           | 36604 NP - SIMPLE/FASTRACK VISIT IN EMERGENCY (AGE 70-79) |
| 36605           | 36605 NP - SIMPLE/FASTRACK VISIT IN EMERGENCY (AGE 80+)   |
| 36606           | 36606 NP - VISIT IN EMERGENCY DEPARTMENT (AGE 0-1)        |
| 36607           | 36607 NP - VISIT IN EMERGENCY DEPARTMENT (AGE 2-59)       |
| 36608           | NP - VISIT IN EMERGENCY DEPARTMENT (AGE 60-69)            |

1  
2  
3  
4  
5  
6  
7  
8  
9  
10  
11  
12  
13  
14  
15  
16  
17  
18  
19  
20  
21  
22  
23  
24  
25  
26  
27  
28  
29  
30  
31  
32  
33  
34  
35  
36  
37  
38  
39  
40  
41  
42  
43  
44  
45  
46  
47  
48  
49  
50  
51  
52  
53  
54  
55  
56  
57  
58  
59  
60

36609 NP - VISIT IN EMERGENCY DEPARTMENT (AGE 70-79)

36610 NP - VISIT IN EMERGENCY DEPARTMENT (AGE 80+)

For peer review only

**Appendix 2.** Disorder groupings and associated diagnosis codes

|                                                      | <b>ICD-9 codes<br/>(MSP claims)</b> | <b>ICD-10 codes<br/>(Hospital Discharge Data)</b> | <b>NACRS Codes</b>                                                                       |
|------------------------------------------------------|-------------------------------------|---------------------------------------------------|------------------------------------------------------------------------------------------|
| <b>Mood and anxiety</b>                              |                                     |                                                   |                                                                                          |
| Depressive disorders                                 | 311                                 | F32, F33, F34.1                                   | F329                                                                                     |
| Anxiety disorders                                    | 300                                 | F40, F41                                          | F419                                                                                     |
| Anxiety/depression (code unique to MSP)              | 50B                                 |                                                   |                                                                                          |
| Bipolar and related disorders                        | 296                                 | F30, F31, F34 (excluding F34.1), F38, F29         | F319                                                                                     |
| <b>Substance use</b>                                 |                                     |                                                   |                                                                                          |
| Substance use                                        | 292, 304, 305                       | F11, F12, F13, F14, F15, F16, F17, F18, F19       | F119, T401, F129, T407, F159, F149, 1405, F169, 1409, 1406, F180, F199, F139, T424, T439 |
| Alcohol                                              | 291, 303                            | F10                                               | F100, F103, T510                                                                         |
| <b>Schizophrenia spectrum</b>                        |                                     |                                                   |                                                                                          |
|                                                      | 295, 297, 298                       | F20, F21, F22, F23, F24, F25, F28, F29            | F209, F239                                                                               |
| <b>Post-traumatic stress and adjustment disorder</b> |                                     |                                                   |                                                                                          |
|                                                      | 308, 309                            | F43                                               |                                                                                          |
| <b>Other mental disorders</b>                        |                                     |                                                   |                                                                                          |
| Neurocognitive                                       | 290, 293, 294                       | F01, F03, F04, F05, F06, F09                      | F03, F059                                                                                |
| Personality disorders                                | 301                                 | F60, F61, F62                                     | F489, F609                                                                               |
| Eating                                               | 307.1, 307.5                        | F50                                               | F509                                                                                     |
| ADHD                                                 | 314                                 | F90                                               |                                                                                          |
| Intellectual disability                              | 317, 318, 319                       | F71, F71, F72, F73, F78, F79                      |                                                                                          |



**The RECORD statement – checklist of items, extended from the STROBE statement, that should be reported in observational studies using routinely collected health data.**

|                           | Item No. | STROBE items                                                                                                                                                                               | Location in manuscript where items are reported | RECORD items                                                                                                                                                                                                                                                                                                                                                                                                                                | Location in manuscript where items are reported |
|---------------------------|----------|--------------------------------------------------------------------------------------------------------------------------------------------------------------------------------------------|-------------------------------------------------|---------------------------------------------------------------------------------------------------------------------------------------------------------------------------------------------------------------------------------------------------------------------------------------------------------------------------------------------------------------------------------------------------------------------------------------------|-------------------------------------------------|
| <b>Title and abstract</b> |          |                                                                                                                                                                                            |                                                 |                                                                                                                                                                                                                                                                                                                                                                                                                                             |                                                 |
|                           | 1        | (a) Indicate the study's design with a commonly used term in the title or the abstract (b) Provide in the abstract an informative and balanced summary of what was done and what was found |                                                 | RECORD 1.1: The type of data used should be specified in the title or abstract. When possible, the name of the databases used should be included.<br><br>RECORD 1.2: If applicable, the geographic region and timeframe within which the study took place should be reported in the title or abstract.<br><br>RECORD 1.3: If linkage between databases was conducted for the study, this should be clearly stated in the title or abstract. | Page 1<br><br>Page 2<br><br>Page 1-2            |
| <b>Introduction</b>       |          |                                                                                                                                                                                            |                                                 |                                                                                                                                                                                                                                                                                                                                                                                                                                             |                                                 |
| Background rationale      | 2        | Explain the scientific background and rationale for the investigation being reported                                                                                                       |                                                 |                                                                                                                                                                                                                                                                                                                                                                                                                                             | Page 4                                          |
| Objectives                | 3        | State specific objectives, including any prespecified hypotheses                                                                                                                           |                                                 |                                                                                                                                                                                                                                                                                                                                                                                                                                             | Page 4                                          |
| <b>Methods</b>            |          |                                                                                                                                                                                            |                                                 |                                                                                                                                                                                                                                                                                                                                                                                                                                             |                                                 |
| Study Design              | 4        | Present key elements of study design early in the paper                                                                                                                                    |                                                 |                                                                                                                                                                                                                                                                                                                                                                                                                                             | Page 4                                          |
| Setting                   | 5        | Describe the setting, locations, and relevant dates, including periods of recruitment, exposure, follow-up, and data collection                                                            |                                                 |                                                                                                                                                                                                                                                                                                                                                                                                                                             | Page 5                                          |

|                              |   |                                                                                                                                                                                                                                                                                                                                                                                                                                                                                                                                                                                                                                                                                                                              |  |                                                                                                                                                                                                                                                                                                                                                                                                                                                                                                                                                                                                                                                                                                      |                                                                                            |
|------------------------------|---|------------------------------------------------------------------------------------------------------------------------------------------------------------------------------------------------------------------------------------------------------------------------------------------------------------------------------------------------------------------------------------------------------------------------------------------------------------------------------------------------------------------------------------------------------------------------------------------------------------------------------------------------------------------------------------------------------------------------------|--|------------------------------------------------------------------------------------------------------------------------------------------------------------------------------------------------------------------------------------------------------------------------------------------------------------------------------------------------------------------------------------------------------------------------------------------------------------------------------------------------------------------------------------------------------------------------------------------------------------------------------------------------------------------------------------------------------|--------------------------------------------------------------------------------------------|
| Participants                 | 6 | <p>(a) <i>Cohort study</i> - Give the eligibility criteria, and the sources and methods of selection of participants. Describe methods of follow-up</p> <p><i>Case-control study</i> - Give the eligibility criteria, and the sources and methods of case ascertainment and control selection. Give the rationale for the choice of cases and controls</p> <p><i>Cross-sectional study</i> - Give the eligibility criteria, and the sources and methods of selection of participants</p> <p>(b) <i>Cohort study</i> - For matched studies, give matching criteria and number of exposed and unexposed</p> <p><i>Case-control study</i> - For matched studies, give matching criteria and the number of controls per case</p> |  | <p>RECORD 6.1: The methods of study population selection (such as codes or algorithms used to identify subjects) should be listed in detail. If this is not possible, an explanation should be provided.</p> <p>RECORD 6.2: Any validation studies of the codes or algorithms used to select the population should be referenced. If validation was conducted for this study and not published elsewhere, detailed methods and results should be provided.</p> <p>RECORD 6.3: If the study involved linkage of databases, consider use of a flow diagram or other graphical display to demonstrate the data linkage process, including the number of individuals with linked data at each stage.</p> | <p>Page 5</p> <p>Page 5</p> <p>Page 4<br/>(Reference: Data Linkage Process on Page 11)</p> |
| Variables                    | 7 | Clearly define all outcomes, exposures, predictors, potential confounders, and effect modifiers. Give diagnostic criteria, if applicable.                                                                                                                                                                                                                                                                                                                                                                                                                                                                                                                                                                                    |  | RECORD 7.1: A complete list of codes and algorithms used to classify exposures, outcomes, confounders, and effect modifiers should be provided. If these cannot be reported, an explanation should be provided.                                                                                                                                                                                                                                                                                                                                                                                                                                                                                      | Page 19, 20                                                                                |
| Data sources/<br>measurement | 8 | For each variable of interest, give sources of data and details of methods of assessment (measurement). Describe comparability of assessment methods if there is more than one group                                                                                                                                                                                                                                                                                                                                                                                                                                                                                                                                         |  |                                                                                                                                                                                                                                                                                                                                                                                                                                                                                                                                                                                                                                                                                                      | Page 4, 5                                                                                  |

|                                                                                                                                                    |                                  |    |                                                                                                                                                                                                                                                                                                                                                                                                                                                                                                                                                                      |                                                                                                                                                       |           |
|----------------------------------------------------------------------------------------------------------------------------------------------------|----------------------------------|----|----------------------------------------------------------------------------------------------------------------------------------------------------------------------------------------------------------------------------------------------------------------------------------------------------------------------------------------------------------------------------------------------------------------------------------------------------------------------------------------------------------------------------------------------------------------------|-------------------------------------------------------------------------------------------------------------------------------------------------------|-----------|
| 1<br>2<br>3<br>4                                                                                                                                   | Bias                             | 9  | Describe any efforts to address potential sources of bias                                                                                                                                                                                                                                                                                                                                                                                                                                                                                                            |                                                                                                                                                       | N/A       |
| 5<br>6<br>7<br>8<br>9                                                                                                                              | Study size                       | 10 | Explain how the study size was arrived at                                                                                                                                                                                                                                                                                                                                                                                                                                                                                                                            |                                                                                                                                                       | N/A       |
| 10<br>11<br>12<br>13<br>14<br>15<br>16<br>17<br>18<br>19<br>20<br>21<br>22<br>23<br>24<br>25<br>26<br>27<br>28<br>29<br>30<br>31<br>32<br>33<br>34 | Quantitative variables           | 11 | Explain how quantitative variables were handled in the analyses. If applicable, describe which groupings were chosen, and why                                                                                                                                                                                                                                                                                                                                                                                                                                        |                                                                                                                                                       | Page 5, 6 |
| 35<br>36<br>37<br>38<br>39<br>40<br>41<br>42<br>43<br>44<br>45<br>46<br>47                                                                         | Statistical methods              | 12 | (a) Describe all statistical methods, including those used to control for confounding<br>(b) Describe any methods used to examine subgroups and interactions<br>(c) Explain how missing data were addressed<br>(d) <i>Cohort study</i> - If applicable, explain how loss to follow-up was addressed<br><i>Case-control study</i> - If applicable, explain how matching of cases and controls was addressed<br><i>Cross-sectional study</i> - If applicable, describe analytical methods taking account of sampling strategy<br>(e) Describe any sensitivity analyses |                                                                                                                                                       | Page 6    |
|                                                                                                                                                    | Data access and cleaning methods |    | ..                                                                                                                                                                                                                                                                                                                                                                                                                                                                                                                                                                   | RECORD 12.1: Authors should describe the extent to which the investigators had access to the database population used to create the study population. | Page 4    |

|                  |    |                                                                                                                                                                                                                                                                                                                                                 |  |                                                                                                                                                                                                                                                                                                                    |                                                         |
|------------------|----|-------------------------------------------------------------------------------------------------------------------------------------------------------------------------------------------------------------------------------------------------------------------------------------------------------------------------------------------------|--|--------------------------------------------------------------------------------------------------------------------------------------------------------------------------------------------------------------------------------------------------------------------------------------------------------------------|---------------------------------------------------------|
|                  |    |                                                                                                                                                                                                                                                                                                                                                 |  | RECORD 12.2: Authors should provide information on the data cleaning methods used in the study.                                                                                                                                                                                                                    |                                                         |
| Linkage          |    | ..                                                                                                                                                                                                                                                                                                                                              |  | RECORD 12.3: State whether the study included person-level, institutional-level, or other data linkage across two or more databases. The methods of linkage and methods of linkage quality evaluation should be provided.                                                                                          | Page 4<br>(Reference: Data Linkage Process, on Page 11) |
| <b>Results</b>   |    |                                                                                                                                                                                                                                                                                                                                                 |  |                                                                                                                                                                                                                                                                                                                    |                                                         |
| Participants     | 13 | (a) Report the numbers of individuals at each stage of the study ( <i>e.g.</i> , numbers potentially eligible, examined for eligibility, confirmed eligible, included in the study, completing follow-up, and analysed)<br>(b) Give reasons for non-participation at each stage.<br>(c) Consider use of a flow diagram                          |  | RECORD 13.1: Describe in detail the selection of the persons included in the study ( <i>i.e.</i> , study population selection) including filtering based on data quality, data availability and linkage. The selection of included persons can be described in the text and/or by means of the study flow diagram. | Page 5, 6,                                              |
| Descriptive data | 14 | (a) Give characteristics of study participants ( <i>e.g.</i> , demographic, clinical, social) and information on exposures and potential confounders<br>(b) Indicate the number of participants with missing data for each variable of interest<br>(c) <i>Cohort study</i> - summarise follow-up time ( <i>e.g.</i> , average and total amount) |  |                                                                                                                                                                                                                                                                                                                    | Page 6, 7, 14–17                                        |
| Outcome data     | 15 | <i>Cohort study</i> - Report numbers of outcome events or summary measures over time<br><i>Case-control study</i> - Report numbers in each exposure                                                                                                                                                                                             |  |                                                                                                                                                                                                                                                                                                                    | Page 6                                                  |

|                   |    |                                                                                                                                                                                                                                                                                                                                                                                                                 |  |                                                                                                                                                                                                                                                                                                          |           |
|-------------------|----|-----------------------------------------------------------------------------------------------------------------------------------------------------------------------------------------------------------------------------------------------------------------------------------------------------------------------------------------------------------------------------------------------------------------|--|----------------------------------------------------------------------------------------------------------------------------------------------------------------------------------------------------------------------------------------------------------------------------------------------------------|-----------|
|                   |    | category, or summary measures of exposure<br><i>Cross-sectional study</i> - Report numbers of outcome events or summary measures                                                                                                                                                                                                                                                                                |  |                                                                                                                                                                                                                                                                                                          |           |
| Main results      | 16 | (a) Give unadjusted estimates and, if applicable, confounder-adjusted estimates and their precision (e.g., 95% confidence interval). Make clear which confounders were adjusted for and why they were included<br>(b) Report category boundaries when continuous variables were categorized<br>(c) If relevant, consider translating estimates of relative risk into absolute risk for a meaningful time period |  |                                                                                                                                                                                                                                                                                                          | N/A       |
| Other analyses    | 17 | Report other analyses done—e.g., analyses of subgroups and interactions, and sensitivity analyses                                                                                                                                                                                                                                                                                                               |  |                                                                                                                                                                                                                                                                                                          | N/A       |
| <b>Discussion</b> |    |                                                                                                                                                                                                                                                                                                                                                                                                                 |  |                                                                                                                                                                                                                                                                                                          |           |
| Key results       | 18 | Summarise key results with reference to study objectives                                                                                                                                                                                                                                                                                                                                                        |  |                                                                                                                                                                                                                                                                                                          | Page 7, 8 |
| Limitations       | 19 | Discuss limitations of the study, taking into account sources of potential bias or imprecision. Discuss both direction and magnitude of any potential bias                                                                                                                                                                                                                                                      |  | RECORD 19.1: Discuss the implications of using data that were not created or collected to answer the specific research question(s). Include discussion of misclassification bias, unmeasured confounding, missing data, and changing eligibility over time, as they pertain to the study being reported. | Page 8    |
| Interpretation    | 20 | Give a cautious overall interpretation of results considering objectives,                                                                                                                                                                                                                                                                                                                                       |  |                                                                                                                                                                                                                                                                                                          | Page 7, 8 |

|                                                           |    |                                                                                                                                                               |  |                                                                                                                                                          |        |
|-----------------------------------------------------------|----|---------------------------------------------------------------------------------------------------------------------------------------------------------------|--|----------------------------------------------------------------------------------------------------------------------------------------------------------|--------|
|                                                           |    | limitations, multiplicity of analyses, results from similar studies, and other relevant evidence                                                              |  |                                                                                                                                                          |        |
| Generalisability                                          | 21 | Discuss the generalisability (external validity) of the study results                                                                                         |  |                                                                                                                                                          | N/A    |
| <b>Other Information</b>                                  |    |                                                                                                                                                               |  |                                                                                                                                                          |        |
| Funding                                                   | 22 | Give the source of funding and the role of the funders for the present study and, if applicable, for the original study on which the present article is based |  |                                                                                                                                                          | Page 3 |
| Accessibility of protocol, raw data, and programming code |    | ..                                                                                                                                                            |  | RECORD 22.1: Authors should provide information on how to access any supplemental information such as the study protocol, raw data, or programming code. | Page 9 |

\*Reference: Benchimol EI, Smeeth L, Guttman A, Harron K, Moher D, Petersen I, Sørensen HT, von Elm E, Langan SM, the RECORD Working Committee. The REporting of studies Conducted using Observational Routinely-collected health Data (RECORD) Statement. *PLoS Medicine* 2015; in press.

\*Checklist is protected under Creative Commons Attribution ([CC BY](https://creativecommons.org/licenses/by/4.0/)) license.

# BMJ Open

## Emergency department use for mental and substance use disorders: Descriptive analysis of population-based, linked administrative data in British Columbia, Canada

|                                 |                                                                                                                                                                                                                                                                                                                                                                                                                                                                                                                                                                                                                                                                                                                                                                                                                                                                                                                                                                                                                                                                                                                                                                                                                                                                                                                                                                                                                                                                          |
|---------------------------------|--------------------------------------------------------------------------------------------------------------------------------------------------------------------------------------------------------------------------------------------------------------------------------------------------------------------------------------------------------------------------------------------------------------------------------------------------------------------------------------------------------------------------------------------------------------------------------------------------------------------------------------------------------------------------------------------------------------------------------------------------------------------------------------------------------------------------------------------------------------------------------------------------------------------------------------------------------------------------------------------------------------------------------------------------------------------------------------------------------------------------------------------------------------------------------------------------------------------------------------------------------------------------------------------------------------------------------------------------------------------------------------------------------------------------------------------------------------------------|
| Journal:                        | <i>BMJ Open</i>                                                                                                                                                                                                                                                                                                                                                                                                                                                                                                                                                                                                                                                                                                                                                                                                                                                                                                                                                                                                                                                                                                                                                                                                                                                                                                                                                                                                                                                          |
| Manuscript ID                   | bmjopen-2021-057072.R1                                                                                                                                                                                                                                                                                                                                                                                                                                                                                                                                                                                                                                                                                                                                                                                                                                                                                                                                                                                                                                                                                                                                                                                                                                                                                                                                                                                                                                                   |
| Article Type:                   | Original research                                                                                                                                                                                                                                                                                                                                                                                                                                                                                                                                                                                                                                                                                                                                                                                                                                                                                                                                                                                                                                                                                                                                                                                                                                                                                                                                                                                                                                                        |
| Date Submitted by the Author:   | 09-Dec-2021                                                                                                                                                                                                                                                                                                                                                                                                                                                                                                                                                                                                                                                                                                                                                                                                                                                                                                                                                                                                                                                                                                                                                                                                                                                                                                                                                                                                                                                              |
| Complete List of Authors:       | Lavergne, M.; Dalhousie University Faculty of Medicine, Department of Family Medicine; Simon Fraser University, Centre for Applied Research in Mental Health and Addiction<br>Shirmaleki, Mehdi; Simon Fraser University, Centre for Applied Health in Mental Health and Addiction<br>Loyal, Jackson; Simon Fraser University at Harbour Centre, Centre for Applied Research in Mental Health and Addictions; British Columbia Centre for Disease Control<br>Jones, Wayne; Simon Fraser University, Centre for Applied Health in Mental Health and Addiction<br>Nicholls, Tonia L.; The University of British Columbia Faculty of Medicine, Department of Psychiatry; Simon Fraser University, Department of Psychology<br>Schütz, Christian; The University of British Columbia Faculty of Medicine, Department of Psychiatry; The University of British Columbia, Centre for Health Evaluation and Outcome Sciences<br>Vaughan, Adam; Simon Fraser University; Texas State University San Marcos<br>Samji, Hasina; Simon Fraser University; British Columbia Centre for Disease Control<br>Puyat, Joseph; The University of British Columbia<br>Kaoser, Ridhwana; Simon Fraser University, Centre for Applied Health in Mental Health and Addiction<br>Kaulius, Megan; Simon Fraser University, Centre for Applied Health in Mental Health and Addiction<br>Small, Will; Simon Fraser University, Faculty of Health Sciences; British Columbia Centre on Substance Use |
| <b>Primary Subject Heading</b>: | Emergency medicine                                                                                                                                                                                                                                                                                                                                                                                                                                                                                                                                                                                                                                                                                                                                                                                                                                                                                                                                                                                                                                                                                                                                                                                                                                                                                                                                                                                                                                                       |
| Secondary Subject Heading:      | Mental health, Addiction                                                                                                                                                                                                                                                                                                                                                                                                                                                                                                                                                                                                                                                                                                                                                                                                                                                                                                                                                                                                                                                                                                                                                                                                                                                                                                                                                                                                                                                 |
| Keywords:                       | ACCIDENT & EMERGENCY MEDICINE, MENTAL HEALTH, Substance misuse < PSYCHIATRY                                                                                                                                                                                                                                                                                                                                                                                                                                                                                                                                                                                                                                                                                                                                                                                                                                                                                                                                                                                                                                                                                                                                                                                                                                                                                                                                                                                              |
|                                 |                                                                                                                                                                                                                                                                                                                                                                                                                                                                                                                                                                                                                                                                                                                                                                                                                                                                                                                                                                                                                                                                                                                                                                                                                                                                                                                                                                                                                                                                          |

1  
2  
3  
4  
5  
6  
7  
8  
9  
10  
11  
12  
13  
14  
15  
16  
17  
18  
19  
20  
21  
22  
23  
24  
25  
26  
27  
28  
29  
30  
31  
32  
33  
34  
35  
36  
37  
38  
39  
40  
41  
42  
43  
44  
45  
46  
47  
48  
49  
50  
51  
52  
53  
54  
55  
56  
57  
58  
59  
60

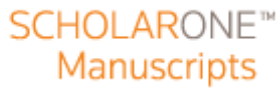





I, the Submitting Author has the right to grant and does grant on behalf of all authors of the Work (as defined in the below author licence), an exclusive licence and/or a non-exclusive licence for contributions from authors who are: i) UK Crown employees; ii) where BMJ has agreed a CC-BY licence shall apply, and/or iii) in accordance with the terms applicable for US Federal Government officers or employees acting as part of their official duties; on a worldwide, perpetual, irrevocable, royalty-free basis to BMJ Publishing Group Ltd ("BMJ") its licensees and where the relevant Journal is co-owned by BMJ to the co-owners of the Journal, to publish the Work in this journal and any other BMJ products and to exploit all rights, as set out in our [licence](#).

The Submitting Author accepts and understands that any supply made under these terms is made by BMJ to the Submitting Author unless you are acting as an employee on behalf of your employer or a postgraduate student of an affiliated institution which is paying any applicable article publishing charge ("APC") for Open Access articles. Where the Submitting Author wishes to make the Work available on an Open Access basis (and intends to pay the relevant APC), the terms of reuse of such Open Access shall be governed by a Creative Commons licence – details of these licences and which [Creative Commons](#) licence will apply to this Work are set out in our licence referred to above.

Other than as permitted in any relevant BMJ Author's Self Archiving Policies, I confirm this Work has not been accepted for publication elsewhere, is not being considered for publication elsewhere and does not duplicate material already published. I confirm all authors consent to publication of this Work and authorise the granting of this licence.

1  
2  
3 **Emergency department use for mental and substance use disorders: Descriptive analysis of**  
4 **population-based, linked administrative data in British Columbia, Canada**  
5  
6

7 M. Ruth Lavergne PhD,<sup>1,2</sup> Mehdi Shirmaleki MSc,<sup>2</sup> Jackson P. Loyal MPH,<sup>2,3</sup> Wayne Jones MA,  
8 MSc,<sup>2</sup> Tonia L. Nicholls PhD,<sup>4,5,6</sup> Christian G. Schütz MD, PhD, MPH,<sup>5,7,8</sup> Adam Vaughan PhD,<sup>6,9</sup>  
9 Hasina Samji PhD,<sup>2,3,6</sup> Joseph H. Puyat PhD,<sup>8,10</sup> Ridhwana Kaoser MPH,<sup>2</sup> Megan Kaulius MA,<sup>2</sup> Will  
10 Small PhD<sup>2,6,11</sup>  
11

- 12  
13 1. Department of Family Medicine, Faculty of Medicine, Dalhousie University  
14 2. Centre for Applied Research in Mental Health and Addiction, Simon Fraser University,  
15 Vancouver, BC  
16 3. BC Centre for Disease Control, Vancouver, BC  
17 4. Department of Psychiatry, University of British Columbia, Vancouver BC  
18 5. Department of Psychology, Simon Fraser University, Burnaby, BC  
19 6. Faculty of Health Sciences, Simon Fraser University, Burnaby, BC  
20 7. BC Mental Health and Substance Use Services, Vancouver, BC  
21 8. Centre for Health Evaluation and Outcome Sciences, University of British Columbia,  
22 Vancouver, BC  
23 9. School of Criminal Justice and Criminology, Texas State University, San Marcos, TX  
24 10. School of Population and Public Health, University of British Columbia, Vancouver, BC  
25 11. BC Centre on Substance Use, Vancouver, BC  
26  
27  
28  
29

30 **Corresponding author:**

31 M. Ruth Lavergne  
32 Associate Professor  
33 Primary Care Research Unit  
34 Department of Family Medicine  
35 Dalhousie University  
36 1465 Brenton Street, Suite 402  
37 Halifax NS B3J 3T4  
38 ruth.lavergne@dal.ca  
39  
40  
41

42 **Word count:** 3199  
43  
44  
45  
46  
47  
48  
49  
50  
51  
52  
53  
54  
55  
56  
57  
58  
59  
60

## Abstract

**Objectives:** Information on emergency department (ED) visits for mental and substance use disorders (MSUDs) is important for planning services but has not been explored in British Columbia (BC), Canada. We describe all MSUD ED visits for people ages 15 and older in the province of BC in 2017/8 and document trends in MSUD ED visits between 2007/8 and 2017/8 by disorder group.

**Design:** Population-based linked administrative data comprised of ED records and physician billings capturing all MSUD ED visits in BC.

**Setting:** BC is Canada's westernmost province with a population of approximately 5 million. Permanent residents receive first-dollar coverage for all medically necessary services provided by licensed physicians or in hospital, including emergency department services.

**Population:** All people age >15 with MSUD ED visits during the study period.

**Measures:** All claims with a service location in the ED or corresponding to fee items billed only in the ED were examined alongside ED visits reported through a national reporting system. Patient characteristics (sex/gender, age, location of residence, income, treated disorders, and comorbidities) and previous outpatient service use for all ED visits by visit diagnosis are also described.

**Results:** A total of 72,363 people made 134,063 visits to the ED in 2017/8 for needs related to MSUD. MSUD ED visits have increased since 2010, particularly visits for substance use and anxiety disorders. People with more frequent visits were more likely to be male, on public prescription drug plans for income assistance, prescribed psychiatric medications, and living in lower income neighbourhoods. They used more community-based primary care and psychiatry services and had lower continuity of primary care.

**Conclusions:** MSUD ED visits are substantial and growing in BC. Findings underscore a need to strengthen and target community healthcare services and to adequately resource and support emergency departments to manage growing patient populations.

**Key words:** mental disorders, substance use disorders, emergency services, emergency department visits, ambulatory care, administrative data

## Article Summary

### Strengths and limitations of this study

- Mental and substance use disorder-related emergency department visits for people ages  $\geq 15$ , patient characteristics, and changes in visit rates over time, are comprehensively described
- Emergency department visits related to mental health and substance use are increasing over time, which must guide service planning.
- Combining emergency department records and physician claims data now permits comprehensive analysis of ED visits.
- This study is preliminary and descriptive and cannot confirm causal drivers of ED visits.
- Only one diagnosis is consistently recorded in the data, even if concurrent disorders are managed during the visits.

### Declarations

**Funding:** This work was supported by the Canadian Institutes of Health Research and the Michael Smith Foundation for Health Research (Partnerships for Health System Improvement grant number FRN – 148170). The funders had no role in the design of the study or in the data analysis and interpretations, nor were they involved in the writing of the manuscript.

**Conflicts of Interest:** The authors have no relevant financial or non-financial interests to disclose. Drs. Ruth Lavergne receives salary support from a Tier II Canada Research Chair in Primary Care and Joseph Puyat receive salary support from a Michael Smith Foundation for Health Research Scholar Award.

## Background

Accurately tracking emergency department (ED) visits related to mental and substance use disorders (MSUD) and understanding the characteristics of people with MSUD ED visits is important for service planning and improving healthcare systems. EDs provide highly accessible acute care [1,2] and in many cases act as an entry point for referral to other, community-based services [1]. However, unscheduled visits to care providers with little knowledge of the patient's history may limit effective patient management [1,2]. Thus, a detailed picture of who uses the ED for MSUD-related needs and an understanding of changing ED use over time is important to plan healthcare delivery.

Internationally, literature points to increasing ED visits across varied populations and contexts [3–8]. In the United States, ED visits by adults with MSUD increased by over 30% between 2006 and 2015, primarily due to alcohol use disorder, followed by mood and anxiety disorders [7]. These findings extend earlier observation of increasing trends between 1992 and 2001 [8]. Similarly in Australia, MSUD ED visits increased between 2004/5 and 2016/7, driven largely by psychoactive substance use, followed by anxiety and mood disorders [3]. In other settings findings differ in terms of what is driving ED use and/or the direction of changes in rates of ED use. Increases between 1988 and 2014 in Taiwan were driven by visits related to trauma and stressor-related disorders, depressive disorders, and suicide attempts [5]. In contrast, in Denmark, the number of MSUD ED visits decreased from 1985 to 2012 [6].

Where data are available, research in Canada appears to coincide with patterns observed in the US, with upward trends primarily reflecting increases in anxiety disorders and substance use disorders [9]. However, Canadian research is limited by the fact that only a subset of ED data is collected by the national reporting system, and comparable data has not been available over time in all provinces. While many studies have examined the characteristics of people with MSUD ED visits cross-sectionally or within specific hospitals or service delivery organizations [10–15] fewer have used population-based data and examined trends over time [9,16].

Given the variability in trends between jurisdictions within the published literature, there is value in additional localized studies. Currently, the characteristics of people visiting emergency departments for MSUD and trends in MSUD ED visits have not been examined in British Columbia (BC), Canada's westernmost province. This information gains added importance within the context of the overdose crisis which has disproportionately impacted BC [17,18]. Our research aims to address this gap, and for the first time ever: 1) comprehensively describe all MSUD ED visits for people ages 15 and older in the province of BC, 2) describe patient and service use characteristics by number of ED visits in 2017/8, and 3) explore changes in MSUD ED visit rates over time by disorder group (2007/8 to 2017/8).

## Methods

### *Data*

We used de-identified data holdings from the BC Ministry of Health linked and made accessible through Population Data BC [19]. Two data sources capture ED visits in BC: the National Ambulatory Care Reporting System (NACRS) [20] and BC's Medical Services Plan (MSP) payment information [21]. NACRS was developed by the Canadian Institute for Health Information to collect data on ED and other ambulatory visits. BC began reporting to NACRS in

2012 and only a subset of EDs are captured (30 of 108 BC hospitals providing ED care in 2017/8). MSP data captures fee-for-service payments made to physicians. All EDs not reporting to NACRS are captured within the MSP data; thus, we have complete data for the entire province.

We used patient registry data [22], as well as information from hospitalizations captured through the Discharge Abstract Database [23] to describe the demographic and clinical characteristics of people with MSUD ED visits. We obtained population estimates used as denominators to construct rates of ED visits from BC Statistics [24].

### *Study population*

We examined all people ages 15+ with MSUD ED visits (diagnosis codes listed in Appendix 1) during the study period.

### *Setting*

The province of BC had a population of approximately 5 million people in 2018 [25]. Five geographic health authorities (Fraser, Vancouver Coastal, Interior, Northern, and Island) are responsible for planning and delivering healthcare service. The provincial health insurance program (MSP) covers all permanent residents, except for a small percentage of the population covered under federal health insurance programs. BC residents insured under MSP receive first-dollar coverage for all medically necessary services provided by licensed physicians or in hospital, including emergency department services.

### *Measures*

*MSUD ED visits:* We identified MSP claims with a service location in the ED or corresponding to fee items billed only in the ED (Appendix 1). We also extracted all ED visits to BC facilities recorded in NACRS data. To ensure visits were not double counted across sources or when multiple MSP claims were submitted for a single patient, we retained only one ED record per patient per day [26]. Where multiple records contained different diagnoses, we retained records for MSUD. Operational definitions for frequent MSUD ED visits vary [12,27]. We examined individual characteristics and outpatient service use based on the following groups for annual visits, ranging from one per year to one per month, on average: 1 ED visit, 2-5 ED visits, 6-11 ED visits, and 12+ ED visits.

*Demographic characteristics:* Age was obtained from BC's MSP registration file. Sex is collected at time of MSP registration. The field is labeled "Gender" on the registration form but only the binary options "M" and "F" are provided. It is not possible to distinguish sex at birth, legal sex, and gender based on this information, so we labelled this "sex/gender." Health Authority was determined based on patient residential address, not location of service use. Neighbourhood income quintile was determined based on census enumeration area of residence, assigned using the Postal Code Conversion File Plus (PCCF+) [28,29].

*Clinical characteristics:* We classified MSUD ED visits based on disorder groupings (Appendix 2). We also examined all other MSUD services in 2017/8. Patients with two outpatient visits or one hospitalization (within a 365-day period) for the disorders listed in Appendix 2 were considered to have been treated for the disorder [30]. We used this case definition as it has been validated by previous studies [31,32] and most closely aligned with

1  
2  
3 expected prevalence [30]. A minimum of two outpatient visits was used to be inclusive of  
4 physician consultation without ongoing care. The use of one outpatient visit overestimated the  
5 prevalence when compared to the expected prevalence for each disorder [30].  
6

7 In BC, diagnostic codes for substance use disorders do not include the fifth digit, and  
8 thus it is difficult to differentiate between substances, with the exception of alcohol. We  
9 created a combined substance use disorders group (including alcohol use) within tables, but  
10 plot alcohol and other substance use separately over time in Figure 1.  
11

12 The Charlson-Deyo Comorbidity Index categorizes diagnosis codes based on 17  
13 weighted categories [33,34]. We presented both the Index's average weight and the  
14 percentage of people with no identified comorbidities based on both outpatient and inpatient  
15 service use.  
16

17 *Health services use:* For all ED visits, we explored if people had an outpatient visit  
18 (service location office, home, or long-term care facility) with a primary care physician with an  
19 MSUD diagnosis code on the same day as the ED visit or in the preceding 30 days. We excluded  
20 visits for Opioid Agonist Treatment (OAT, fee codes 00039 and 15039). We also determined the  
21 percentage of ED visits that subsequently resulted in hospitalization. We identified involuntary  
22 hospitalizations under BC's Mental Health Act as those in which the patient was apprehended  
23 and admitted by police and/or if forms 4, 10, 20 or 21 were on the patient's record.  
24

25 For all people seen in the ED, we examined outpatient service use in the 365 days  
26 preceding their first ED visit in 2017/8. We counted the number of primary care visits occurring  
27 in the previous year (total, for MSUD, and for OAT) and report the percentage of people with no  
28 visits. We calculated continuity of care over this period using the Continuity of Care Index  
29 (COCI). The COCI identifies the number of primary care physicians providing service to a patient  
30 and the percentage of care provided by each physician. The index ranges from 0 (all visits to  
31 different physicians/no visit) to 1 (all visits with one physician). In BC, primary care physicians  
32 can bill a \$100 fee for people with Axis 1 conditions of sufficient severity to interfere with  
33 activities of daily living. The fee requires doctors to conduct a comprehensive review of the  
34 patient's history, assess the patient, and develop a treatment and management plan [35]. We  
35 examined the proportion of people with a primary care mental health planning fee billed on  
36 their behalf in the 365 days preceding the ED visit as a marker of active management in primary  
37 care. We also examined number of outpatient visits (excluding visits with a hospital, day  
38 surgery, or ED service location code) with a psychiatrist in the preceding year and the  
39 percentage of people with no psychiatrist visits.  
40  
41  
42  
43  
44

#### 45 *Analysis*

46 Our intention was to describe the volume of services within the system and the nature  
47 of the presenting population and so we chose to report both visit-level and patient-level  
48 information using data from 2017/18. We first describe patient characteristics associated with  
49 each ED visit, stratified by the MSUD diagnosis associated with the visit. We report numbers  
50 and percentages or means and standard deviations, as appropriate, and calculated the rate of  
51 ED visits per 1,000 population by health authority and income quintile.  
52

53 Next, we describe the characteristics of people by number of ED visits in 2017/8. In this  
54 analysis the unit of analysis is the individual patient. We report numbers and percentages or  
55 means and standard deviations, as appropriate.  
56  
57



1  
2  
3 Finally, we present ED visits per 1,000 population from 2007/8 to 2017/8, stratified by  
4 disorders presenting to ED. Only visits captured in MSP data were considered in examining  
5 trends over time as NACRS data in BC were not available before 2012. We also note that BC fee-  
6 for-service data uses a code “50B” in addition to standard ICD9 codes for anxiety and  
7 depression. For this reason, it is not possible to distinguish mood and anxiety disorders in all  
8 cases. In plotting rates over time, we present this code separately for clarity.  
9  
10

### 11 *Ethics approval*

12 This study was approved by the University of British Columbia, Providence Health Care  
13 Research Institute, and Simon Fraser University research ethics boards (REB number H17-  
14 00506). All inferences, opinions and conclusions drawn in this article are those of the authors,  
15 and do not reflect the opinions or policies of the data stewards.  
16  
17  
18

### 19 *Patient and public involvement*

20 Neither patients nor the public were involved in the design, conduct, reporting, or  
21 dissemination plans of this research.  
22  
23

## 24 **Results**

25 We observed 134,063 ED visits for MSUDs in 2017/8 across 72,363 people in BC. This  
26 means roughly 1.5% of British Columbians ages 15 and older ( $n = 4,118,960$ ) used an emergency  
27 department for MSUD in 2017/8. In total, 35.7% of visits were for mood or anxiety disorders,  
28 36.7% for substance use disorders, 7.6% for schizophrenia spectrum disorders, 5.4% for post-  
29 traumatic stress disorder (PTSD) and adjustment disorders, and 14.6% for other mental  
30 disorders (e.g., attention-deficit/hyperactivity disorder [ADHD], eating disorders, intellectual  
31 disability, neurocognitive disorder, and personality disorders) (Table 1). More than half of visits  
32 for substance use and schizophrenia were among people recorded as male (67.7% and 64.9%,  
33 respectively), and more than half of visits for mood or anxiety and for PTSD and adjustment  
34 disorders were among people recorded as female (55.9% and 53.8%, respectively). More visits  
35 for other mental disorders, which include organic neurocognitive disorders, were among people  
36 aged 65+ (39.2%).  
37  
38  
39

40 Total visit rates were higher in the Northern and Interior Health Authorities (45.1 and  
41 36.5 per 1,000 population), whereas Fraser and Vancouver Coastal Health Authorities saw  
42 higher visit rates for schizophrenia spectrum disorders (3.2 and 2.9 per 1,000 population) (Table  
43 1). Pronounced gradients by neighbourhood income were observed across all disorders. Rates  
44 of MSUD ED visits for people living in low-income neighbourhoods were more than double  
45 rates for people living in high-income neighbourhoods (48.2 versus 19.1 per 1,000 population).  
46 Visits for people with substance use and schizophrenia spectrum disorders were especially high  
47 among people living in the lowest income neighbourhoods relative to the other disorders. The  
48 Charlson-Deyo index, a measure of physical comorbidities, was similar across all groups except  
49 other disorders, which also had an older age distribution.  
50  
51

52 We found that 26.6% of ED visits were preceded by a primary care visit for mental  
53 health or substance use within 30 days, and 6.1% of ED visits occurred on the same day as a  
54 separate primary care visit (Table 1). Across all disorders, approximately 22.6% of ED visits were  
55 followed by a hospital admission, of which more than half were involuntary admissions under  
56  
57



1  
2  
3 BC's Mental Health Act. The percentage of people hospitalized was highest for schizophrenia  
4 spectrum disorders and lowest for substance use disorders for both total and involuntary  
5 hospitalizations.  
6

7 Rates of MSUD ED visits are increasing over time, and changes are largely driven by  
8 visits for substance use disorders, though visits for anxiety disorders also increased notably  
9 (Figure 1). The percentage of people who are recorded as male, who live in metropolitan areas  
10 and in the lowest income neighbourhoods, and who have drug coverage under public  
11 Pharmacare (a marker of low-income status) all evidenced an increasing number of ED visits in  
12 2017/8 (Table 2). The percentage of people treated for each disorder group and two or more  
13 disorders also increased with number of ED visits. Among people with 12 or more ED visits,  
14 88.9% had been treated for a substance use disorder. The Charlson-Deyo index of comorbidities  
15 was similar regardless of the number of ED visits. People with more ED visits also had higher  
16 mean outpatient primary care service use (all visits for MSUD and for OAT) but lower continuity  
17 of care with primary care providers (Table 2). People with more ED visits also had higher mean  
18 outpatient psychiatrist visits, though overall 78.4% of people with one or more ED visits and  
19 62.4% of people with 12+ ED visits did not have an outpatient psychiatrist visit in the preceding  
20 year.  
21  
22  
23  
24

## 25 Discussion

26 As expected, based on international literature, rates of ED visits for MSUD are  
27 substantial and growing, with roughly 1.5% of British Columbians ages 15 and older visiting an  
28 emergency department for MSUD in 2017/8. The upward trend in ED visits largely reflects the  
29 impact of substance use and anxiety disorders as has been observed in other studies [3,7,9].  
30 High rates of comorbidity between substance use and anxiety disorders within clinical and  
31 population samples are well established [36]. Symptoms of both substance use and substance  
32 use withdrawal can mimic anxiety symptoms [36,37] and may be treated as anxiety. Others  
33 have proposed psychological distress, which has been increasing, is being treated as anxiety  
34 [38]. Self-medication for anxiety disorders may also be driving ED visits for substance use  
35 disorders [39].  
36  
37  
38

39 Pronounced income gradients reflect the association between socioeconomic status and  
40 mental illness but may also suggest that EDs play a particularly important role as an access  
41 point for people living with low incomes (as indicated by low-income neighbourhoods and  
42 receiving drug coverage under public Pharmacare). This is consistent with patterns observed in  
43 cross-provincial Canadian data [40] and elsewhere [2,10,41,42]. We also observed regional  
44 variations in ED use that is likely due to differences in healthcare infrastructure and service  
45 provision. Northern Health, the least populous and geographically the largest region, saw the  
46 highest rate for ED use per 1,000 population. Meanwhile, Vancouver Coastal, the region with  
47 the highest concentration of specialist services, had the lowest rate.  
48  
49

50 A recent report released by the BC Ministry of Mental Health and Addiction [43] echoed  
51 and renewed calls to action [44,45] to improve MSUD services in BC. Our results are not  
52 surprising but add to the urgency of strengthening systems for MSUD service delivery. We  
53 found people with more frequent ED visits have higher use of outpatient services, indicating  
54 that existing community-based services are not meeting people's healthcare needs. Roughly a  
55 quarter of people had a MSUD primary care visit within 30 days preceding their MSUD ED visit,  
56  
57

1  
2  
3 suggesting people are seeking out care in the community but are unable to access care that  
4 mitigates the need for ED services. The fact that people with more frequent visits had lower  
5 continuity of care may suggest gaps in coordination and integration of outpatient services,  
6 corroborating previous research [46–49]. This may also suggest primary care providers do not  
7 currently have the capacity to deliver care to help circumvent MSUD-related ED use. At the  
8 same time, well over half of people who visited the ED multiple times in the year did not have  
9 any outpatient psychiatrist visits in the year preceding their ED visit, reflecting ongoing issues  
10 accessing specialist care in the community [50]. Improved integration and collaboration  
11 between primary care and specialist MSUD services could potentially address this issue [51,52],  
12 but this has not been widely adopted in BC. Indeed, decreasing MSUD ED visits in Denmark  
13 coincided with the establishment of outpatient psychiatry clinics and specialist outreach teams  
14 [6]. Alongside more integrated and collaborative treatment models, service planning efforts  
15 should focus on expanding community-based specialist care, for example, through  
16 telepsychiatry including rapid access to virtual care [53,54]. Provision of telepsychiatry may also  
17 help reduce ED visits as observed in BC's more rural health regions by addressing regional  
18 inequities (i.e., access to specialist care) [53].  
19  
20  
21  
22  
23

### 24 *Strengths and Limitations*

25 This study uses province-wide population-based data to, for the first time,  
26 comprehensively describe ED use for MSUDs. In the context of COVID-19, the ability to track  
27 MSUD service use, and highlight potential gaps, gains additional significance. Our methods may  
28 be useful to other researchers seeking to track changing patterns of ED service use. At the same  
29 time, it is preliminary and descriptive, and thus, subject to several important limitations. Trends  
30 in diagnoses over time are based on MSP data only. The subset of facilities where fee-for-  
31 service claims are not submitted may differ in disorders seen and possibly also in changes over  
32 time. Only one diagnosis is consistently recorded in fee-for-service and NACRS data, even if  
33 concurrent disorders are managed during the visits. This may lead to under-detection of  
34 substance use disorders in particular, as has been observed in validation studies [55]. People  
35 with certain mental disorders (e.g., schizophrenia) and substance use disorders are at high risk  
36 of experiencing violence [56,57] and may also seek out ED services accordingly. These visits are  
37 not likely to capture the underlying MSUD and thus will not be recorded in our data. Similarly,  
38 visits for self-injurious behaviours due to substance use [58] do not likely capture the  
39 underlying substance use disorder. We cannot confirm causal drivers of increasing rates of ED  
40 visits for substance use disorders and anxiety disorders.  
41  
42  
43  
44  
45

### 46 **Conclusion**

47 The use of ED services for MSUD is substantial and growing in BC. While substance use  
48 disorders largely accounts for increasing rates over time, visits for anxiety disorders and other  
49 conditions are also increasing. Findings underscore the urgent need to strengthen and target  
50 community healthcare services for people who remain poorly served, and to adequately  
51 resource and support emergency departments to manage growing and changing patient  
52 populations.  
53  
54  
55  
56  
57

1  
2  
3 **Author's Contributions:** Ruth Lavergne planned analysis and led drafting of the manuscript.  
4 Mehdi Shirmaleki conducted analysis of linked data, including development of methods for  
5 capturing ED visits. Jackson Loyal contributed to conception of the paper and literature review.  
6 Wayne Jones, Tonia Nicholls, Christian Schütz, Adam Vaughan, Hasina Samji, Joseph Puyat,  
7 Ridhwana Kaoser, and Megan Kaulius all contributed to planning analysis, interpreting findings,  
8 and made critical revisions to the manuscript. Will Small oversaw all aspects of this study and  
9 assisted in interpretation of findings. All authors approve this version of the paper and agree to  
10 act as guarantors of this research.  
11  
12  
13

14 **Data availability statement:** Linked, de-identified data holdings from the BC Ministry of Health  
15 linked and made accessible through Population Data BC were used for analysis. We are not  
16 permitted to share the research extract used in this analysis with other researchers, but all data  
17 are available through Population Data BC. All inferences, opinions and conclusions drawn in this  
18 article are those of the authors, and do not reflect the opinions or policies of the data stewards.  
19  
20  
21

### 22 **Figure caption**

23 **Figure 1.** Rates of emergency department visits for mental and substance use disorders over  
24 time by diagnosis assigned to visit (physician claims only).  
25  
26  
27  
28  
29  
30  
31  
32  
33  
34  
35  
36  
37  
38  
39  
40  
41  
42  
43  
44  
45  
46  
47  
48  
49  
50  
51  
52  
53  
54  
55  
56  
57  
58  
59  
60

## References

1. Wise-Harris D, Pauly D, Kahan D, et al. "Hospital was the only option": Experiences of frequent emergency department users in mental health. *Adm Policy Ment Health*. 2017;44(3):405–412. Available from: doi:10.1007/s10488-016-0728-3
2. Fleury M-J, Grenier G, Farand L et al. Use of emergency rooms for mental health reasons in Quebec: Barriers and facilitators. *Adm Policy Ment Health*. 2019;46(1):18–33. Available from: doi:10.1007/s10488-018-0889-3
3. Tran QN, Lambeth LG, Sanderson K, et al. Trend of emergency department presentations with a mental health diagnosis in Australia by diagnostic group, 2004–05 to 2016–17. *Emerg Med Australas*. 2020;32(2):190–201. Available from: doi:10.1111/1742-6723.13451
4. Benarous X, Milhiet V, Oppetit A, et al. Changes in the use of emergency care for the youth with mental health problems over decades: A repeated cross sectional study. *Front Psychiatry*. 2019;10:26. Available from: doi:10.3389/fpsy.2019.00026
5. Chen W, Hsieh MH, Liao S, et al. A quarter of century after: The changing ecology of psychiatric emergency services. *Asia Pac Psychiatry*. 2021;e12487. Available from: doi:10.1111/appy.12487
6. Moltke K, Høegh EB, Sæbye D, et al. Psychiatric emergency services in Copenhagen 2012: A 27-year psychiatric and demographic follow-up study. *Nord J Psychiatry*. 2015;69:1741–7. Available from: doi:10.3109/08039488.2014.1003402
7. Nam E, Lee E, Kim H. 10-year trends of emergency department visits, wait time, and length of stay among adults with mental health and substance use disorders in the United States. *Psychiatr Q*. 2021;1-16. Available from: doi:10.1007/s11126-021-09894-y
8. Larkin GL, Claassen CA, Emond JA, et al. Trends in U.S. emergency department visits for mental health conditions, 1992 to 2001. *Psychiatr Serv*. 2005;56:671–7. Available from: doi:10.1197/2Fj.aem.2004.02.391
9. Chiu M, Gatov E, Vigod SN, et al. Temporal trends in mental health service utilization across outpatient and acute care sectors: A population-based study from 2006 to 2014. *Can J Psychiatry*. 2018;63(2):94–102. Available from: doi:10.1177/0706743717748926
10. Doupe MB, Palatnick W, Day S, et al. Frequent users of emergency departments: Developing standard definitions and defining prominent risk factors. *Ann Emerg Med*. 2012;60(1):24–32. Available from: doi:10.1016/j.annemergmed.2011.11.036
11. Kendall CE, Boucher LM, Mark AE, et al. A cohort study examining emergency department visits and hospital admissions among people who use drugs in Ottawa, Canada. *Harm Reduct J*. 2017;14(1):16. Available from: doi:10.1186/s12954-017-0143-4

- 1  
2  
3 12. Vandyk AD, Harrison MB, VanDenKerkhof EG, et al. Frequent emergency department use by  
4 individuals seeking mental healthcare: A systematic search and review. *Arch Psychiatr Nurs*.  
5 2013;27(4):171–178. Available from: doi:10.1016/j.apnu.2013.03.001  
6  
7  
8 13. Hynie M, Ardern CI, Robertson A. Emergency room visits by uninsured child and adult  
9 residents in Ontario, Canada: What diagnoses, severity and visit disposition reveal about the  
10 impact of being uninsured. *J Immigr and Minor Health*. 2016;18(5):948–956. Available from:  
11 doi:10.1007/s10903-016-0351-0  
12  
13  
14 14. Chambers C, Chiu S, Katic M, et al. High utilizers of emergency health services in a  
15 population-based cohort of homeless adults. *Am J Public Health*. 2013;103(S2):S302–S310.  
16 Available from: doi:10.2105/AJPH.2013.301397  
17  
18  
19 15. Saunders NR, Gill PJ, Holder L, et al. Use of the emergency department as a first point of  
20 contact for mental health care by immigrant youth in Canada: A population-based study. *CMAJ*.  
21 2018;190(40):E1183–E1191. Available from: doi:10.1503/cmaj.180277.  
22  
23  
24 16. Newton AS, Rosychuk RJ, Dong K, et al. Emergency health care use and follow-up among  
25 sociodemographic groups of children who visit emergency departments for mental health  
26 crises. *CMAJ*. 2012;184(12):E665–E674. Available from: doi:10.1503/cmaj.111697  
27  
28  
29 17. Krausz RM, Westenbergh JN, Ziafat K. The opioid overdose crisis as a global health challenge.  
30 *Curr Opin Psychiatry*. 2021;34(4):405–412. doi:10.1097/YCO.0000000000000712  
31  
32  
33 18. Belzak L, Halverson J. Evidence synthesis - The opioid crisis in Canada: a national  
34 perspective. *Health Promot Chronic Dis Prev Can*. 2018;38(6):224–233. Available from:  
35 doi:10.24095/hpcdp.38.6.02  
36  
37  
38 19. Population Data BC. (n.d.). The data linkage process. Available from  
39 <https://www.popdata.bc.ca/datalinkage/process>  
40  
41  
42 20. Canadian Institute for Health Information. National ambulatory care reporting system  
43 metadata (NACRS), 2017-2018. Population Data BC; 2019. Available from:  
44 <http://www.popdata.bc.ca/data>  
45  
46  
47 21. British Columbia Ministry of Health. Medical services plan (MSP) payment information file.  
48 Population Data BC; 2019. Available from: <http://www.popdata.bc.ca/data>  
49  
50  
51 22. British Columbia Ministry of Health. Consolidation File (MSP Registration & Premium  
52 Billing). Population Data BC; 2018. Available from: <http://www.popdata.bc.ca/data>  
53  
54  
55 23. Canadian Institute for Health Information. Discharge Abstract Database. Population Data  
56 BC; 2018. Available from: <http://www.popdata.bc.ca/data>  
57  
58  
59 24. British Columbia Statistics. Sub-provincial population projections - P.E.O.P.L.E. 2018.  
60 Available from: <https://www.bcstats.gov.bc.ca/apps/PopulationProjections.aspx>

- 1  
2  
3 25. British Columbia Statistics. British Columbia Population Estimates: Annual Population, July 1,  
4 1867-2019. 2021. Available from: [https://www2.gov.bc.ca/assets/gov/data/statistics/people-](https://www2.gov.bc.ca/assets/gov/data/statistics/people-population-community/population/pop_bc_annual_estimates.csv)  
5 [population-community/population/pop\\_bc\\_annual\\_estimates.csv](https://www2.gov.bc.ca/assets/gov/data/statistics/people-population-community/population/pop_bc_annual_estimates.csv)  
6  
7  
8 26. Peterson S, Wickham M, Lavergne R, et al. Methods to comprehensively identify emergency  
9 department visits using administrative data in British Columbia. Vancouver (BC): UBC Centre for  
10 Health Services and Policy Research; Feb 2021. Available from:  
11 <https://www.popdata.bc.ca/sites/default/files/documents/data%20access/methodological/CH>  
12 [SPR-ED-Report-2021.pdf](https://www.popdata.bc.ca/sites/default/files/documents/data%20access/methodological/CH)  
13  
14  
15 27. Moe J, Bailey AL, Oland R, et al. Defining, quantifying, and characterizing adult frequent  
16 users of a suburban Canadian emergency department. CJEM. 2013;15:214–26. Available from:  
17 doi:10.2310/8000.2013.130936  
18  
19  
20 28. Wilkins R. Use of postal codes and addresses in the analysis of health data. Health Rep.  
21 1993;5(2):157.  
22  
23 29. Wilkins R. Automated Geographic Coding Based on the Statistics Canada Postal Code  
24 Conversion Files, Including Postal Codes through March 2009. Ottawa: Analysis Division,  
25 Statistics Canada; 2009.  
26  
27  
28 30. Jones W, Kaoser R, Samji H, et al. Identifying mental and substance use disorders using  
29 administrative data. Centre for Applied Research in Mental Health and Addictions; 2020.  
30  
31 31. Frayne SM, Miller DR, Sharkansky EJ, et al. Using administrative data to identify mental  
32 illness: What approach is best? Am J Med Qual. 2010;25:42–50. Available from:  
33 doi:10.1177/1062860609346347  
34  
35  
36 32. Kisely S, Lin E, Lesage A, et al. Use of administrative data for the surveillance of mental  
37 disorders in 5 provinces. Can J Psychiatry. 2009;54:571–5. Available from:  
38 doi:10.1177/070674370905400810  
39  
40  
41 33. Deyo RA, Cherkin DC, Ciol MA. Adapting a clinical comorbidity index for use with ICD-9-CM  
42 administrative databases. J Clin Epidemiol. 1992;45:613–9.  
43  
44  
45 34. Quan H, Sundararajan V, Halfon Pet al. Coding algorithms for defining comorbidities in ICD-  
46 9-CM and ICD-10 administrative data: Med Care. 2005;43(11):1130–1139. Available from:  
47 doi:10.1097/01.mlr.0000182534.19832.83  
48  
49  
50 35. Doctors of British Columbia. Mental Health Fees. 2020. Available from:  
51 <https://gpscbc.ca/sites/default/files/uploads/GPSC-Mental-Health-Billing-Guide-20210101.pdf>  
52  
53 36. Grant BF, Stinson FS, Dawson DA, et al. Prevalence and co-occurrence of substance use  
54 disorders and independent mood and anxiety disorders: Results from the National  
55 Epidemiologic Survey on Alcohol and Related Conditions. Arch Gen Psychiatry. 2004;61:807–  
56 816.  
57  
58  
59  
60



- 1  
2  
3 37. Vorspan F, Mehtelli W, Dupuy G, et al. Anxiety and substance use disorders: Co-occurrence  
4 and clinical issues. *Curr Psychiatry Rep.* 2015;17(2):4. Available from: doi:10.1007/s11920-014-  
5 0544-y  
6  
7  
8 38. Baxter AJ, Scott KM, Ferrari AJ, Norman RE, Vos T, Whiteford HA. Challenging the myth of an  
9 “epidemic” of common mental disorders: Trends in the global prevalence of anxiety and  
10 depression between 1990 and 2010: *Depress Anxiety.* 2014;31:506–16.  
11  
12 39. Robinson J, Sareen J, Cox B, et al. Role of self-medication in the development of comorbid  
13 anxiety and substance use disorders: A longitudinal investigation. *Arch Gen Psychiatry.*  
14 2011;68(8)800-7. Available from: doi:10.1001/archgenpsychiatry.2011.75  
15  
16  
17 40. Canadian Institute for Health Information. Common challenges, shared priorities: Measuring  
18 access to home and community care and to mental health and addictions services in Canada.  
19 Ottawa, ON: CIHI; 2019. Available from: [https://www.cihi.ca/sites/default/files/document/shp-](https://www.cihi.ca/sites/default/files/document/shp-companion-report-en.pdf)  
20 [companion-report-en.pdf](https://www.cihi.ca/sites/default/files/document/shp-companion-report-en.pdf)  
21  
22  
23 41. Urbanoski K, Inglis D, Veldhuizen S. Service use and unmet needs for substance use and  
24 mental disorders in Canada. *Can J Psychiatry.* 2017;62(8):551–559. Available from:  
25 doi:10.1177/0706743717714467  
26  
27  
28 42. Fleury M-J, Grenier G, Bamvita J-M, et al. Typology of patients who use emergency  
29 departments for mental and substance use disorders. *BJPsych Open.* 2020;6(4):e59. Available  
30 from: doi:10.1192/bjo.2020.39  
31  
32  
33 43. BC Ministry of Mental Health and Addictions. A pathway to hope: A roadmap for making  
34 mental health and addictions care better for people in British Columbia. 2019. Available from:  
35 [https://www2.gov.bc.ca/assets/gov/british-columbians-our-governments/initiatives-plans-](https://www2.gov.bc.ca/assets/gov/british-columbians-our-governments/initiatives-plans-strategies/mental-health-and-addictions-strategy/bcmentalhealthroadmap_2019web-5.pdf)  
36 [strategies/mental-health-and-addictions-strategy/bcmentalhealthroadmap\\_2019web-5.pdf](https://www2.gov.bc.ca/assets/gov/british-columbians-our-governments/initiatives-plans-strategies/mental-health-and-addictions-strategy/bcmentalhealthroadmap_2019web-5.pdf)  
37  
38  
39 44. Canadian Alliance on Mental, Illness and Mental Health. A call for action: Building consensus  
40 for a national action plan on mental illness and mental health. Ottawa, ON; 2000. Available  
41 from: [https://mdsc.ca/documents/Publications/A%20call%20for%20action\\_EN.pdf](https://mdsc.ca/documents/Publications/A%20call%20for%20action_EN.pdf)  
42  
43  
44 45. BC Ministry of Health Services and BC Ministry of Children and Family Development. Healthy  
45 minds, healthy people - A 10-year plan to address mental health and substance use in British  
46 Columbia. 2010. Available from:  
47 [https://www.health.gov.bc.ca/library/publications/year/2010/healthy\\_minds\\_healthy\\_people.](https://www.health.gov.bc.ca/library/publications/year/2010/healthy_minds_healthy_people.pdf)  
48 [pdf](https://www.health.gov.bc.ca/library/publications/year/2010/healthy_minds_healthy_people.pdf)  
49  
50  
51 46. Colligan EM, Pines JM, Colantuoni E, et al. Factors associated with frequent emergency  
52 department use in the medicare population. *Med Care Res Rev.* 2017;74(3):311–327. Available  
53 from: doi:10.1177/1077558716641826  
54  
55  
56  
57  
58  
59  
60

- 1  
2  
3 47. Marshall EG, Clarke B, Burge F, et al. Improving continuity of care reduces emergency  
4 department visits by long-term care residents. *J Am Board Fam Med*. 2016;29(2):201–208.  
5 Available from: doi:10.3122/jabfm.2016.12.150309  
6  
7  
8 48. McCusker J, Tousignant P, Silva RBD, et al. Factors predicting patient use of the emergency  
9 department: A retrospective cohort study. *CMAJ*. 2012;184(6):E307–E316. Available from:  
10 doi:10.1503/cmaj.111069  
11  
12 49. Ionescu-Ittu R, McCusker J, Ciampi A, et al. Continuity of primary care and emergency  
13 department utilization among elderly people. *CMAJ*. 2007;177(11):1362–1368. Available from:  
14 doi:10.1503/cmaj.061615  
15  
16  
17 50. Goldner EM, Jones W, Fang ML. Access to and waiting time for psychiatrist services in a  
18 Canadian urban area: A study in real time. *Can J Psychiatry*. 2011;56:474–80. Available from:  
19 doi:10.1177/070674371105600805  
20  
21  
22 51. Fleury M-J, Imboua A, Aubé D, et al. General practitioners' management of mental  
23 disorders: A rewarding practice with considerable obstacles. *BMC Fam Pract*. 2012;13:1–12.  
24 Available from: doi:10.1186/1471-2296-13-19  
25  
26  
27 52. Jego M, Debaty E, Ouirini L, et al. Caring for patients with mental disorders in primary care:  
28 a qualitative study on French GPs' views, attitudes and needs. *Fam Pract*. 2019;36:72–6.  
29 Available from: doi:10.1093/fampra/cmz107  
30  
31  
32 53. Fortney JC, Pyne JM, Turner EE, et al. Telepsychiatry integration of mental health services  
33 into rural primary care settings. *Int J Psychiatry*. 2015;27:525–39. Available from:  
34 doi:10.3109/09540261.2015.1085838  
35  
36  
37 54. Costanza A, Mazzola V, Radomska M, et al. Who consult an adult psychiatric emergency  
38 department? Pertinence of admissions and opportunities for telepsychiatry. *Medicina*.  
39 2020;56(6):295. Available from: doi: 10.3390/medicina56060295  
40  
41  
42 55. Wang L, Homayra F, Pearce LA, et al. Identifying mental health and substance use disorders  
43 using emergency department and hospital records: a population-based retrospective cohort  
44 study of diagnostic concordance and disease attribution. *BMJ Open*. 2019;9:e030530. Available  
45 from: doi:10.1136/bmjopen-2019-030530  
46  
47  
48 56. Khalifeh H, Dean K. Gender and violence against people with severe mental illness. *Int J*  
49 *Psychiatry*. 2010;22:535–46. Available from: doi:10.3109/09540261.2010.506185  
50  
51  
52 57. Darke S, Torok M, Kaye S, et al. Attempted suicide, self-harm, and violent victimization  
53 among regular illicit drug users. *Suicide Life Threat Behav*. 2010;40:587–96.  
54  
55  
56 58. Costanza A, Rothen S, Achab S, et al. Impulsivity and impulsivity-related endophenotypes in  
57 suicidal patients with substance use disorders: An exploratory study. *Int J Ment Health Addict*.  
58 2021;19(5):1729-44. Available from: doi:10.1007/s11469-020-00259-3  
59  
60



**Table 1.** Emergency department visits for mental and substance use disorders in British Columbia (2017/8) by individual characteristics and discharge diagnosis.

|                                                     | <b>Mood and Anxiety</b> |         | <b>Substance Use</b> |         | <b>Schizophrenia spectrum</b> |         | <b>PTSD and adjustment</b> |         | <b>Other Mental</b> |         | <b>Total</b> |          |
|-----------------------------------------------------|-------------------------|---------|----------------------|---------|-------------------------------|---------|----------------------------|---------|---------------------|---------|--------------|----------|
| Total Visits, n (%)                                 | 47,881                  | (35.7%) | 49,164               | (36.7%) | 10,219                        | (7.6%)  | 7,236                      | (5.4%)  | 19,563              | (14.6%) | 134,063      | (100.0%) |
| <b>Sex</b>                                          |                         |         |                      |         |                               |         |                            |         |                     |         |              |          |
| Female                                              | 26,775                  | (55.9%) | 15,865               | (32.3%) | 3,585                         | (35.1%) | 3,896                      | (53.8%) | 9,720               | (49.7%) | 59,841       | (44.6%)  |
| Male                                                | 21,106                  | (44.1%) | 33,299               | (67.7%) | 6,634                         | (64.9%) | 3,340                      | (46.2%) | 9,838               | (50.3%) | 74,217       | (55.4%)  |
| Unknown                                             | 0                       |         | 0                    |         | 0                             |         | 0                          |         | 5                   |         | 5            |          |
| <b>Age</b>                                          |                         |         |                      |         |                               |         |                            |         |                     |         |              |          |
| 15-24                                               | 12,430                  | (26.0%) | 7,582                | (15.4%) | 1,526                         | (14.9%) | 2,183                      | (30.2%) | 3,019               | (15.4%) | 26,740       | (19.9%)  |
| 25-44                                               | 17,740                  | (37.1%) | 22,142               | (45.0%) | 4,899                         | (47.9%) | 2,596                      | (35.9%) | 5,076               | (25.9%) | 52,453       | (39.1%)  |
| 45-64                                               | 11,922                  | (24.9%) | 16,328               | (33.2%) | 3,069                         | (30.0%) | 1,734                      | (24.0%) | 3,790               | (19.4%) | 36,843       | (27.5%)  |
| 65+                                                 | 5,789                   | (12.1%) | 3,112                | (6.3%)  | 725                           | (7.1%)  | 723                        | (10.0%) | 7,678               | (39.2%) | 18,027       | (13.4%)  |
| <b>Health Authority (rate per 1,000 population)</b> |                         |         |                      |         |                               |         |                            |         |                     |         |              |          |
| Interior                                            | 8,684                   | (13.3)  | 10,124               | (15.5)  | 918                           | (1.4)   | 1,435                      | (2.2)   | 2,683               | (4.1)   | 23,844       | (36.5)   |
| Fraser                                              | 18,948                  | (12.6)  | 16,812               | (11.2)  | 4,759                         | (3.2)   | 2,665                      | (1.8)   | 7,518               | (5.0)   | 50,702       | (33.7)   |
| Vancouver Coastal                                   | 7,479                   | (7.2)   | 11,252               | (10.8)  | 3,019                         | (2.9)   | 997                        | (1.0)   | 4,740               | (4.5)   | 27,487       | (26.4)   |
| Vancouver Island                                    | 8,412                   | (12.2)  | 7,219                | (10.5)  | 1,045                         | (1.5)   | 1,275                      | (1.9)   | 3,613               | (5.2)   | 21,564       | (31.3)   |
| Northern                                            | 4,315                   | (18.9)  | 3,638                | (16.0)  | 457                           | (2.0)   | 862                        | (3.8)   | 989                 | (4.3)   | 10,261       | (45.1)   |
| Missing HA                                          | 43                      |         | 119                  |         | 21                            |         |                            |         | 20                  |         | 205          |          |
| <b>Income quintile (rate per 1,000 population)</b>  |                         |         |                      |         |                               |         |                            |         |                     |         |              |          |
| Q1 (lowest)                                         | 13,113                  | (14.7)  | 17,818               | (20.0)  | 3,972                         | (4.5)   | 2,122                      | (2.4)   | 5,979               | (6.7)   | 43,004       | (48.2)   |
| Q2                                                  | 10,048                  | (13.2)  | 10,124               | (13.3)  | 2,185                         | (2.9)   | 1,619                      | (2.1)   | 3,995               | (5.2)   | 27,971       | (36.7)   |
| Q3                                                  | 8,988                   | (11.3)  | 7,732                | (9.8)   | 1,602                         | (2.0)   | 1,277                      | (1.6)   | 3,536               | (4.5)   | 23,135       | (29.2)   |
| Q4                                                  | 8,237                   | (10.0)  | 6,992                | (8.5)   | 1,251                         | (1.5)   | 1,155                      | (1.4)   | 3,130               | (3.8)   | 20,765       | (25.1)   |
| Q5 (highest)                                        | 6,786                   | (8.0)   | 4,944                | (5.8)   | 985                           | (1.2)   | 907                        | (1.1)   | 2,539               | (3.0)   | 16,161       | (19.1)   |
| Missing Income                                      | 709                     |         | 1,554                |         | 224                           |         | 156                        |         | 384                 |         | 3,027        |          |
| <b>Comorbidities</b>                                |                         |         |                      |         |                               |         |                            |         |                     |         |              |          |
| Charlson-Deyo weighted index (mean, SD)             | 0.7                     | ± 1.5   | 0.8                  | ± 1.7   | 0.7                           | ± 1.5   | 0.7                        | ± 1.5   | 1.7                 | ± 2.4   | 0.9          | ± 1.8    |

1  
2  
3  
4  
5  
6  
7  
8  
9  
10  
11  
12  
13  
14  
15  
16  
17  
18  
19  
20  
21  
22  
23  
24  
25  
26  
27  
28  
29  
30  
31  
32  
33  
34  
35  
36  
37  
38  
39  
40  
41  
42  
43  
44  
45  
46  
47

|                                                  |        |         |        |         |       |         |       |         |       |         |        |         |
|--------------------------------------------------|--------|---------|--------|---------|-------|---------|-------|---------|-------|---------|--------|---------|
| No Charlson-Deyo diagnoses                       | 33,139 | (69.2%) | 32,239 | (65.6%) | 6,558 | (64.2%) | 5,084 | (70.3%) | 8,253 | (42.2%) | 85,273 | (63.6%) |
| <b>Service use before and after ED</b>           |        |         |        |         |       |         |       |         |       |         |        |         |
| MSUD primary care visit within preceding 30 days | 13,764 | (28.7%) | 13,387 | (27.2%) | 2,226 | (21.8%) | 1,695 | (23.4%) | 4,554 | (23.3%) | 35,626 | (26.6%) |
| MSUD primary care visit on same day as ED visit  | 3,252  | (6.8%)  | 2,890  | (5.9%)  | 520   | (5.1%)  | 384   | (5.3%)  | 1,172 | (6.0%)  | 8,218  | (6.1%)  |
| Hospital admission on same or next day           | 10,188 | (21.3%) | 6,428  | (13.1%) | 4,531 | (44.3%) | 1,474 | (20.4%) | 7,634 | (39.0%) | 30,255 | (22.6%) |
| Involuntary admission on same or next day        | 6,464  | (13.5%) | 2,093  | (4.3%)  | 3,767 | (36.9%) | 749   | (10.4%) | 3,239 | (16.6%) | 16,312 | (12.2%) |

For peer review only

**Table 2.** Individual characteristics and outpatient service use by number of MSUD ED visits 2017/8. N(%) except where indicated.

|                                               | 1 ED visit |         | 2-5 ED visits |         | 6-11 ED visits |         | 12+ ED visits |         | All people |          |
|-----------------------------------------------|------------|---------|---------------|---------|----------------|---------|---------------|---------|------------|----------|
| Total                                         | 50,107     | (69.2%) | 19,353        | (26.7%) | 2,138          | (3.0%)  | 765           | (1.1%)  | 72,363     | (100.0%) |
| <b>Sex</b>                                    |            |         |               |         |                |         |               |         |            |          |
| Female                                        | 24,958     | (49.8%) | 8,851         | (45.7%) | 834            | (39.0%) | 268           | (35.0%) | 34,911     | (48.2%)  |
| Male                                          | 25,149     | (50.2%) | 10,502        | (54.3%) | 1,304          | (61.0%) | 497           | (65.0%) | 37,450     | (51.8%)  |
| <b>Age</b>                                    |            |         |               |         |                |         |               |         |            |          |
| 15_24                                         | 11,169     | (22.3%) | 4,326         | (22.4%) | 377            | (17.6%) | 105           | (13.7%) | 15,977     | (22.1%)  |
| 25_44                                         | 16,625     | (33.2%) | 7,486         | (38.7%) | 981            | (45.9%) | 373           | (48.8%) | 25,465     | (35.2%)  |
| 45_64                                         | 12,337     | (24.6%) | 5,073         | (26.2%) | 639            | (29.9%) | 253           | (33.1%) | 18,302     | (25.3%)  |
| 65+                                           | 9,976      | (19.9%) | 2,468         | (12.8%) | 141            | (6.6%)  | 34            | (4.4%)  | 12,619     | (17.4%)  |
| <b>Health Authority</b>                       |            |         |               |         |                |         |               |         |            |          |
| Interior                                      | 8,797      | (17.6%) | 2,884         | (14.9%) | 257            | (12.0%) | 198           | (25.9%) | 12,136     | (16.8%)  |
| Fraser                                        | 17,801     | (35.5%) | 7,706         | (39.8%) | 926            | (43.3%) | 266           | (34.8%) | 26,699     | (36.9%)  |
| Vancouver Coastal                             | 10,005     | (20.0%) | 3,916         | (20.2%) | 481            | (22.5%) | 175           | (22.9%) | 14,577     | (20.1%)  |
| Vancouver Island                              | 8,969      | (17.9%) | 3,245         | (16.8%) | 324            | (15.2%) | 88            | (11.5%) | 12,626     | (17.4%)  |
| Northern                                      | 4,409      | (8.8%)  | 1,577         | (8.1%)  | 147            | (6.9%)  | 38            | (5.0%)  | 6,171      | (8.5%)   |
| Missing                                       | 126        | (0.3%)  | 25            | (0.1%)  |                | (0.0%)  |               | (0.0%)  | 154        | (0.2%)   |
| <b>Rurality</b>                               |            |         |               |         |                |         |               |         |            |          |
| Metropolitan                                  | 30,734     | (61.3%) | 12,286        | (63.5%) | 1,456          | (68.1%) | 587           | (76.7%) | 45,063     | (62.3%)  |
| Small urban                                   | 11,648     | (23.2%) | 4,385         | (22.7%) | 449            | (21.0%) | 110           | (14.4%) | 16,592     | (22.9%)  |
| Rural/remote                                  | 7,595      | (15.2%) | 2,655         | (13.7%) | 229            | (10.7%) | 68            | (8.9%)  | 10,547     | (14.6%)  |
| Unknown                                       | 39         | (0.1%)  | 7             | (0.0%)  |                | (0.0%)  |               | (0.0%)  | 47         | (0.1%)   |
| <b>Neighbourhood income quintile</b>          |            |         |               |         |                |         |               |         |            |          |
| Q1 (lowest)                                   | 13,794     | (27.5%) | 6,158         | (31.8%) | 797            | (37.3%) | 306           | (40.0%) | 21,055     | (29.1%)  |
| Q2                                            | 10,377     | (20.7%) | 3,994         | (20.6%) | 449            | (21.0%) | 162           | (21.2%) | 14,982     | (20.7%)  |
| Q3                                            | 9,273      | (18.5%) | 3,403         | (17.6%) | 345            | (16.1%) | 111           | (14.5%) | 13,132     | (18.1%)  |
| Q4                                            | 8,610      | (17.2%) | 3,029         | (15.7%) | 282            | (13.2%) | 93            | (12.2%) | 12,014     | (16.6%)  |
| Q5 (highest)                                  | 7,088      | (14.1%) | 2,341         | (12.1%) | 202            | (9.4%)  | 69            | (9.0%)  | 9,700      | (13.4%)  |
| Missing                                       | 965        | (1.9%)  | 428           | (2.2%)  | 63             | (2.9%)  | 24            | (3.1%)  | 1,480      | (2.0%)   |
| <b>Prescription drug plan (BC Pharmacare)</b> |            |         |               |         |                |         |               |         |            |          |

|    |                                                                                |        |         |        |         |       |         |      |         |        |         |
|----|--------------------------------------------------------------------------------|--------|---------|--------|---------|-------|---------|------|---------|--------|---------|
| 1  |                                                                                |        |         |        |         |       |         |      |         |        |         |
| 2  |                                                                                |        |         |        |         |       |         |      |         |        |         |
| 3  | Plan C (income assistance)                                                     | 9,939  | (19.8%) | 7,012  | (36.2%) | 1,232 | (57.6%) | 494  | (64.6%) | 18,677 | (25.8%) |
| 4  | Plan G (psychiatric medications))                                              | 4,234  | (8.4%)  | 3,543  | (18.3%) | 476   | (22.3%) | 168  | (22.0%) | 8,421  | (11.6%) |
| 5  |                                                                                |        |         |        |         |       |         |      |         |        |         |
| 6  | <b>Treated disorders</b>                                                       |        |         |        |         |       |         |      |         |        |         |
| 7  | Mood and anxiety                                                               | 20,611 | (41.1%) | 12,804 | (66.2%) | 1,632 | (76.3%) | 493  | (64.4%) | 35,540 | (49.1%) |
| 8  | Substance use                                                                  | 9,102  | (18.2%) | 9,423  | (48.7%) | 1,642 | (76.8%) | 680  | (88.9%) | 20,847 | (28.8%) |
| 9  | Schizophrenia spectrum                                                         | 3,159  | (6.3%)  | 4,331  | (22.4%) | 899   | (42.0%) | 281  | (36.7%) | 8,670  | (12.0%) |
| 10 | PTSD and adjustment                                                            | 3,439  | (6.9%)  | 3,177  | (16.4%) | 529   | (24.7%) | 219  | (28.6%) | 7,364  | (10.2%) |
| 11 | Other                                                                          | 7,085  | (14.1%) | 4,427  | (22.9%) | 849   | (39.7%) | 304  | (39.7%) | 12,665 | (17.5%) |
| 12 | Two or more treated MSUDs                                                      | 10,058 | (20.1%) | 10,517 | (54.3%) | 1,755 | (82.1%) | 561  | (73.3%) | 22,891 | (31.6%) |
| 13 |                                                                                |        |         |        |         |       |         |      |         |        |         |
| 14 | <b>Physical comorbidities</b>                                                  |        |         |        |         |       |         |      |         |        |         |
| 15 |                                                                                |        |         |        |         |       |         |      |         |        |         |
| 16 | Charlson-Deyo weighted index (mean, SD)                                        | 0.9    | ± 1.8   | 0.8    | ± 1.7   | 0.9   | ± 1.7   | 1.0  | ± 1.8   | 0.9    | ± 1.8   |
| 17 | No Charlson-Deyo diagnoses                                                     | 32,815 | (65.5%) | 12,716 | (65.7%) | 1,261 | (59.0%) | 435  | (56.9%) | 47,227 | (65.3%) |
| 18 |                                                                                |        |         |        |         |       |         |      |         |        |         |
| 19 | <b>Outpatient service use (in 365 days preceding first ED visit in 2017/8)</b> |        |         |        |         |       |         |      |         |        |         |
| 20 | Primary care visits, excluding OAT (mean, SD)                                  | 8.2    | ±9.0    | 8.8    | ± 9.7   | 9.6   | ± 10.5  | 9.9  | ± 11.9  | 8.4    | ± 9.3   |
| 21 | No primary care visits (N, %)                                                  | 6,761  | (13.5%) | 2,588  | (13.4%) | 282   | (13.2%) | 107  | (14.0%) | 9,738  | (13.5%) |
| 22 | MSUD primary care visits,                                                      |        |         |        |         |       |         |      |         |        |         |
| 23 | excluding methadone (mean, SD)                                                 | 1.8    | ± 3.5   | 2.8    | ± 4.3   | 3.7   | ± 5.3   | 4.1  | ± 6.1   | 2.1    | ± 3.9   |
| 24 | No MSUD primary care visit (N, %)                                              | 26,511 | (52.9%) | 7,762  | (40.1%) | 660   | (30.9%) | 239  | (31.2%) | 35,172 | (48.6%) |
| 25 | OAT visits (mean, SD)                                                          | 1.1    | ± 7.2   | 1.8    | ± 8.8   | 2.5   | ± 10.2  | 3.5  | ± 11.8  | 1.4    | ± 7.9   |
| 26 | No OAT visits (N, %)                                                           | 48,370 | (96.5%) | 18,187 | (94.0%) | 1,943 | (90.9%) | 592  | (77.4%) | 69,092 | (95.5%) |
| 27 | Continuity of care index (mean, SD)                                            | 0.43   | ± 0.38  | 0.41   | ± 0.37  | 0.36  | ± 0.35  | 0.36 | ± 0.35  | 0.42   | ± 0.38  |
| 28 | Primary care management fee billed                                             | 3,400  | (6.8%)  | 1,704  | (8.8%)  | 204   | (9.5%)  | 69   | (9.0%)  | 5,377  | (7.4%)  |
| 29 | Outpatient psychiatrist visits (mean, SD)                                      | 1.1    | ± 4.4   | 2.2    | ± 6.1   | 3.8   | ± 8.5   | 3.5  | ± 9.2   | 1.5    | ± 5.2   |
| 30 | No outpatient psychiatrist visit (N, %)                                        | 41,704 | (83.2%) | 13,345 | (69.0%) | 1,176 | (55.0%) | 477  | (62.4%) | 56,702 | (78.4%) |
| 31 |                                                                                |        |         |        |         |       |         |      |         |        |         |
| 32 |                                                                                |        |         |        |         |       |         |      |         |        |         |

\*The categories "missing" and "male" were combined in this table so as not to disclose cell sizes with fewer than five individuals

1  
2  
3  
4  
5  
6  
7  
8  
9  
10  
11  
12  
13  
14  
15  
16  
17  
18  
19  
20  
21  
22  
23  
24  
25  
26  
27  
28  
29  
30  
31  
32  
33  
34  
35  
36  
37  
38  
39  
40  
41  
42  
43  
44  
45  
46  
47

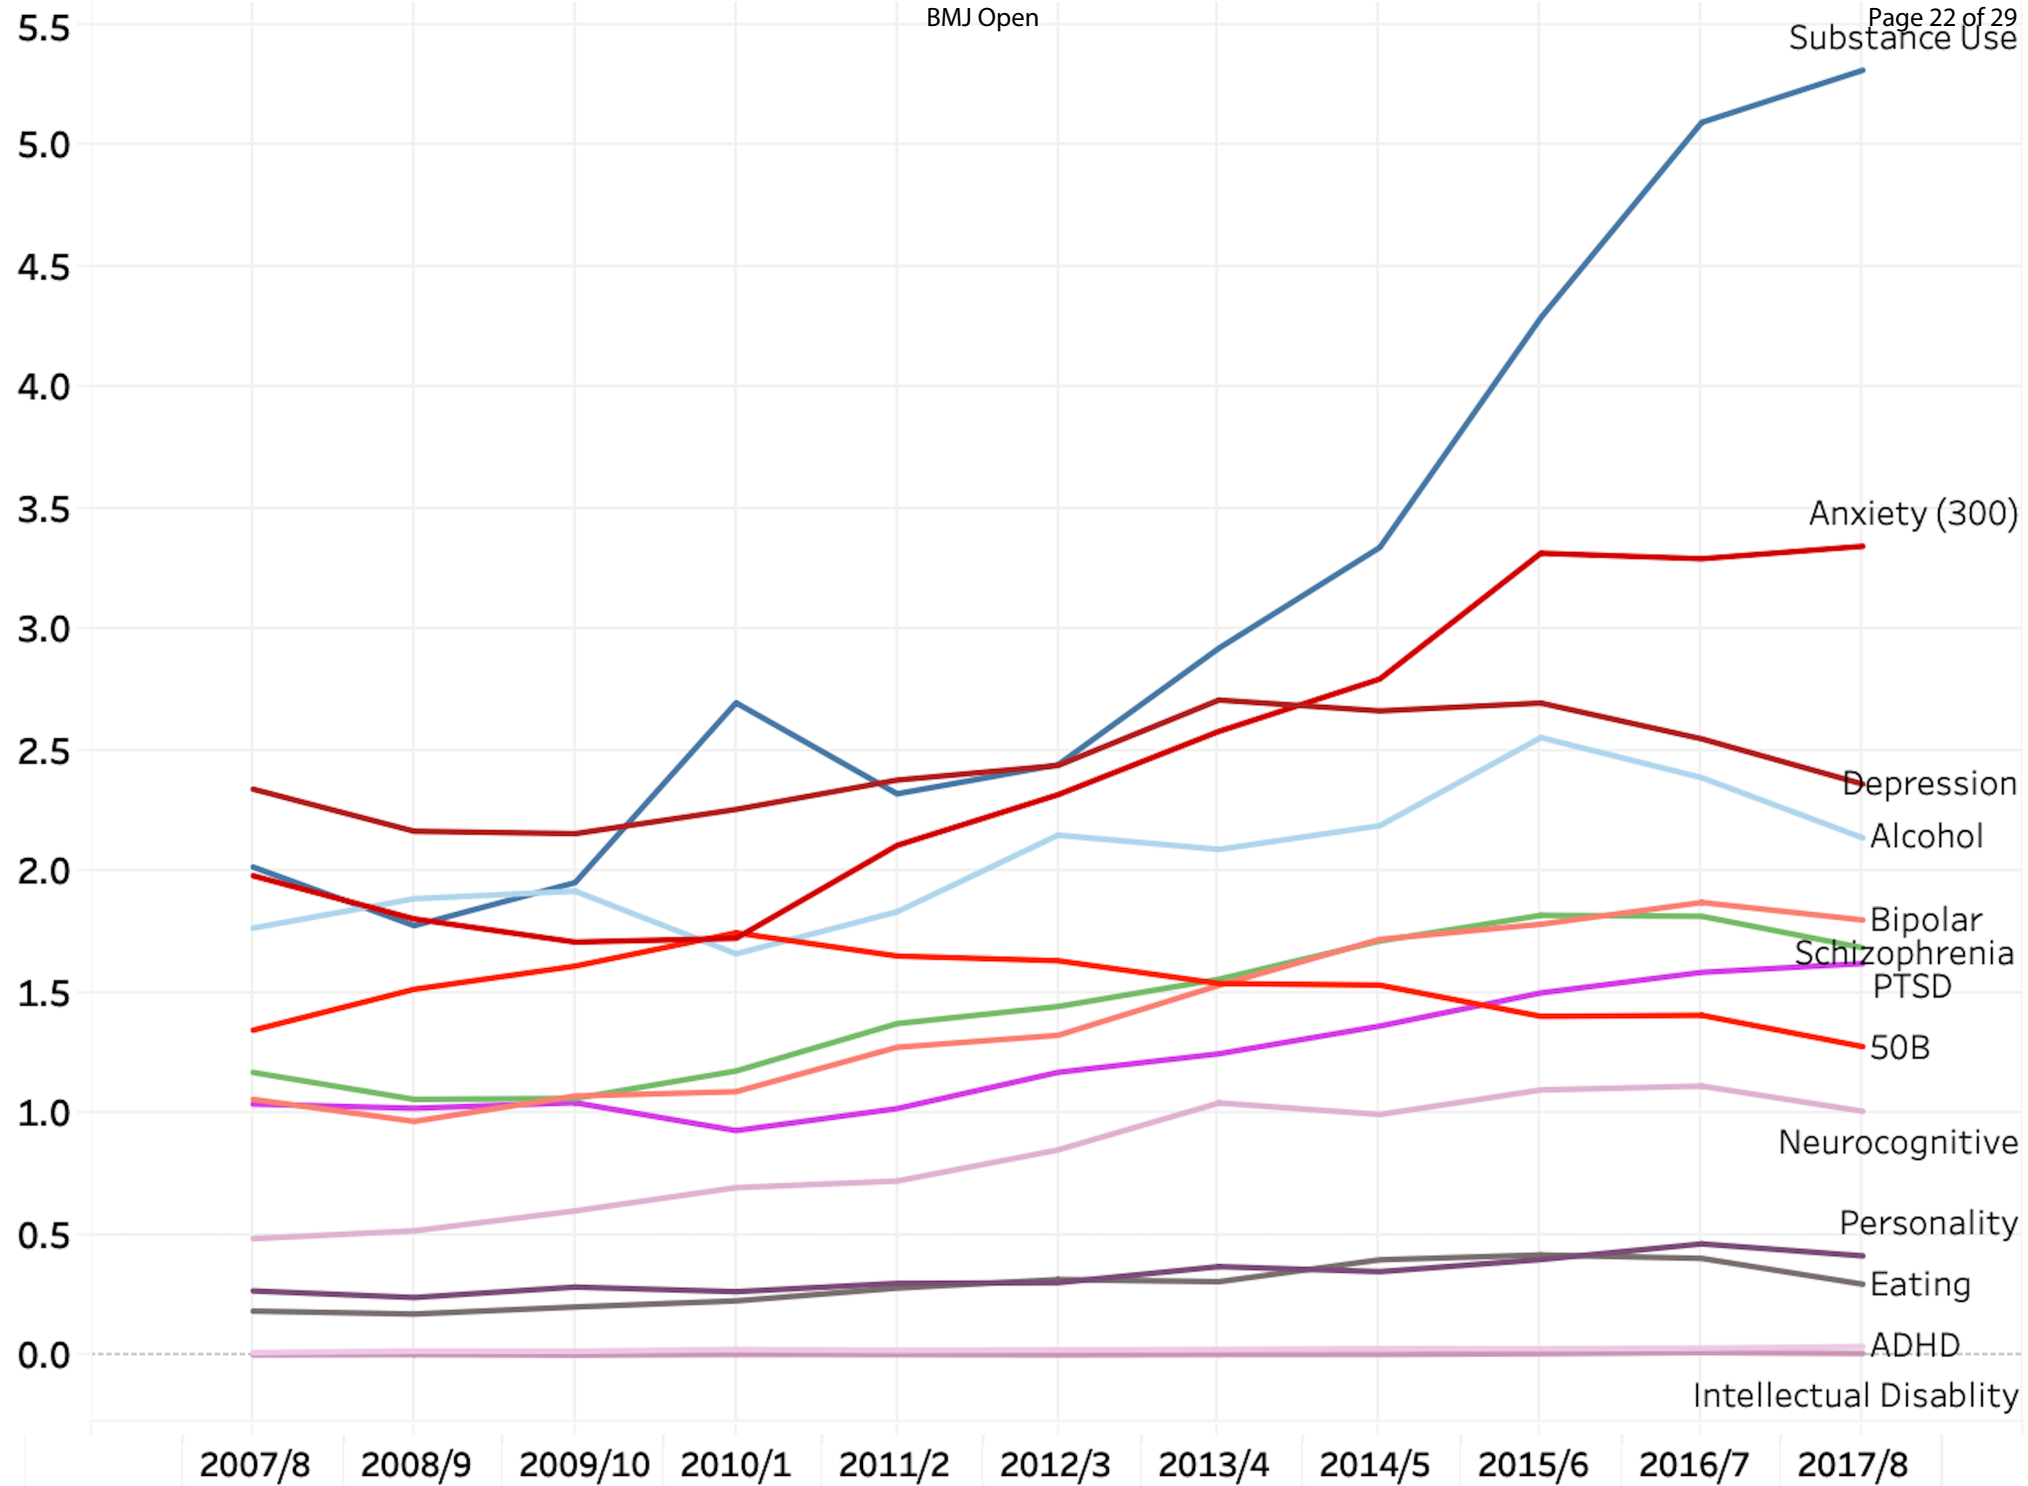

**Appendix 1.** List of fee codes included in identification of ED visits using Medical Services Plan  
Payment data

| <b>FEE ITEM</b> | <b>DESCRIPTION</b>                                        |
|-----------------|-----------------------------------------------------------|
| 1811            | LEVEL I EMERGENCY CARE - DAY                              |
| 1812            | 01812 LEVEL II EMERGENCY CARE - DAY                       |
| 1813            | 01813 LEVEL III EMERGENCY CARE - DAY                      |
| 1821            | 01821 LEVEL I EMERGENCY CARE - EVENING                    |
| 1822            | 01822 LEVEL II EMERGENCY CARE - EVENING                   |
| 1823            | 01823 LEVEL III EMERGENCY CARE - EVENING                  |
| 1831            | 01831 LEVEL I EMERGENCY CARE - NIGHT                      |
| 1832            | 01832 LEVEL II EMERGENCY CARE - NIGHT                     |
| 1833            | 01833 LEVEL III EMERGENCY CARE - NIGHT                    |
| 1841            | 01841 LEVEL I EMERGENCY CARE - SAT, SUN, OR STAT HOL      |
| 1842            | 01841 LEVEL I EMERGENCY CARE - SAT, SUN, OR STAT HOL      |
| 1843            | 01841 LEVEL I EMERGENCY CARE - SAT, SUN, OR STAT HOL      |
| 96801           | 96801 APB-LEVEL I EMERGENCY CARE DAY                      |
| 96802           | 96802 APB - LEVEL 2 EMERGENCY CARE - DAY                  |
| 96803           | 96803 APB - LEVEL 3 EMERGENCY CARE - DAY                  |
| 96804           | 96804 APB- LEVEL 4 EMERGENCY CARE - DAY                   |
| 96805           | 96805 APB - LEVEL 5 EMERGENCY CARE - DAY                  |
| 96811           | 96811 APB-LEVEL I EMERGENCY CARE - EVENING                |
| 96812           | 96812 APB - LEVEL 2 EMERGENCY CARE - EVENING              |
| 96813           | 96813 APP - LEVEL 3 EMERGENCY CARE - EVENING              |
| 96814           | 96814 APB - LEVEL 4 EMERGENCY CARE - EVENING              |
| 96815           | 96815 APB - LEVEL 5 EMERGENCY CARE - EVENING              |
| 96821           | 96821 APB - LEVEL 1 EMERGENCY CARE - NIGHT                |
| 96822           | 96822 APB - LEVEL 2 EMERGENCY CARE - NIGHT                |
| 96823           | 96823 APB -LEVEL 3 EMERGENCY CARE - NIGHT                 |
| 96824           | 96824 APB - LEVEL 4 EMERGENCY CARE - NIGHT                |
| 96825           | 96825 APB - LEVEL 5 EMERGENCY CARE - NIGHT                |
| 36347           | 36347 NP - VISIT, EMERGENCY (BETWEEN 0800 AND 1800 HRS)   |
| 36440           | 36440 NP - SIMPLE/FASTRACK VISIT IN EMERGENCY (AGE 50-59) |
| 36441           | 36441 NP - EMERGENCY DEPARTMENT VISIT (AGE 50-59)         |
| 36447           | 36447 NP - SIMPLE/FASTRACK VISIT IN EMERGENCY (AGE 2-19)  |
| 36448           | 36448 NP - EMERGENCY DEPARTMENT VISIT (AGE 2-19)          |
| 36601           | 36601 NP - SIMPLE/FASTRACK VISIT IN EMERGENCY (AGE 0-1)   |
| 36602           | 36602 NP - SIMPLE/FASTRACK VISIT IN EMERGENCY (AGE 2-59)  |
| 36603           | 36603 NP - SIMPLE/FASTRACK VISIT IN EMERGENCY (AGE 60-69) |
| 36604           | 36604 NP - SIMPLE/FASTRACK VISIT IN EMERGENCY (AGE 70-79) |
| 36605           | 36605 NP - SIMPLE/FASTRACK VISIT IN EMERGENCY (AGE 80+)   |
| 36606           | 36606 NP - VISIT IN EMERGENCY DEPARTMENT (AGE 0-1)        |
| 36607           | 36607 NP - VISIT IN EMERGENCY DEPARTMENT (AGE 2-59)       |
| 36608           | NP - VISIT IN EMERGENCY DEPARTMENT (AGE 60-69)            |

1  
2  
3 36609 NP - VISIT IN EMERGENCY DEPARTMENT (AGE 70-79)  
4 36610 NP - VISIT IN EMERGENCY DEPARTMENT (AGE 80+)  
5  
6  
7  
8  
9  
10  
11  
12  
13  
14  
15  
16  
17  
18  
19  
20  
21  
22  
23  
24  
25  
26  
27  
28  
29  
30  
31  
32  
33  
34  
35  
36  
37  
38  
39  
40  
41  
42  
43  
44  
45  
46  
47  
48  
49  
50  
51  
52  
53  
54  
55  
56  
57  
58  
59  
60

For peer review only

**Appendix 2.** Disorder groupings and associated diagnosis codes

|                                                      | ICD-9 codes<br>(MSP claims) | ICD-10 codes<br>(Hospital Discharge Data)   | NACRS Codes                                                                              |
|------------------------------------------------------|-----------------------------|---------------------------------------------|------------------------------------------------------------------------------------------|
| <b>Mood and anxiety</b>                              |                             |                                             |                                                                                          |
| Depressive disorders                                 | 311                         | F32, F33, F34.1                             | F329                                                                                     |
| Anxiety disorders                                    | 300                         | F40, F41                                    | F419                                                                                     |
| Anxiety/depression (code unique to MSP)              | 50B                         |                                             |                                                                                          |
| Bipolar and related disorders                        | 296                         | F30, F31, F34 (excluding F34.1), F38, F29   | F319                                                                                     |
| <b>Substance use</b>                                 |                             |                                             |                                                                                          |
| Substance use                                        | 292, 304, 305               | F11, F12, F13, F14, F15, F16, F17, F18, F19 | F119, T401, F129, T407, F159, F149, 1405, F169, 1409, 1406, F180, F199, F139, T424, T439 |
| Alcohol                                              | 291, 303                    | F10                                         | F100, F103, T510                                                                         |
| <b>Schizophrenia spectrum</b>                        |                             |                                             |                                                                                          |
|                                                      | 295, 297, 298               | F20, F21, F22, F23, F24, F25, F28, F29      | F209, F239                                                                               |
| <b>Post-traumatic stress and adjustment disorder</b> |                             |                                             |                                                                                          |
|                                                      | 308, 309                    | F43                                         |                                                                                          |
| <b>Other mental disorders</b>                        |                             |                                             |                                                                                          |
| Neurocognitive                                       | 290, 293, 294               | F01, F03, F04, F05, F06, F09                | F03, F059                                                                                |
| Personality disorders                                | 301                         | F60, F61, F62                               | F489, F609                                                                               |
| Eating                                               | 307.1, 307.5                | F50                                         | F509                                                                                     |
| ADHD                                                 | 314                         | F90                                         |                                                                                          |
| Intellectual disability                              | 317, 318, 319               | F71, F71, F72, F73, F78, F79                |                                                                                          |



**The RECORD statement – checklist of items, extended from the STROBE statement, that should be reported in observational studies using routinely collected health data.**

|                           | Item No. | STROBE items                                                                                                                                                                               | Location in manuscript where items are reported | RECORD items                                                                                                                                                                                                                                                                                                                                                                                                                                | Location in manuscript where items are reported |
|---------------------------|----------|--------------------------------------------------------------------------------------------------------------------------------------------------------------------------------------------|-------------------------------------------------|---------------------------------------------------------------------------------------------------------------------------------------------------------------------------------------------------------------------------------------------------------------------------------------------------------------------------------------------------------------------------------------------------------------------------------------------|-------------------------------------------------|
| <b>Title and abstract</b> |          |                                                                                                                                                                                            |                                                 |                                                                                                                                                                                                                                                                                                                                                                                                                                             |                                                 |
|                           | 1        | (a) Indicate the study's design with a commonly used term in the title or the abstract (b) Provide in the abstract an informative and balanced summary of what was done and what was found |                                                 | RECORD 1.1: The type of data used should be specified in the title or abstract. When possible, the name of the databases used should be included.<br><br>RECORD 1.2: If applicable, the geographic region and timeframe within which the study took place should be reported in the title or abstract.<br><br>RECORD 1.3: If linkage between databases was conducted for the study, this should be clearly stated in the title or abstract. | Page 1<br><br>Page 2<br><br>Page 1-2            |
| <b>Introduction</b>       |          |                                                                                                                                                                                            |                                                 |                                                                                                                                                                                                                                                                                                                                                                                                                                             |                                                 |
| Background rationale      | 2        | Explain the scientific background and rationale for the investigation being reported                                                                                                       |                                                 |                                                                                                                                                                                                                                                                                                                                                                                                                                             | Page 4                                          |
| Objectives                | 3        | State specific objectives, including any prespecified hypotheses                                                                                                                           |                                                 |                                                                                                                                                                                                                                                                                                                                                                                                                                             | Page 4                                          |
| <b>Methods</b>            |          |                                                                                                                                                                                            |                                                 |                                                                                                                                                                                                                                                                                                                                                                                                                                             |                                                 |
| Study Design              | 4        | Present key elements of study design early in the paper                                                                                                                                    |                                                 |                                                                                                                                                                                                                                                                                                                                                                                                                                             | Page 4                                          |
| Setting                   | 5        | Describe the setting, locations, and relevant dates, including periods of recruitment, exposure, follow-up, and data collection                                                            |                                                 |                                                                                                                                                                                                                                                                                                                                                                                                                                             | Page 5                                          |

|                                                                                                                                                                                                            |          |                                                                                                                                                                                                                                                                                                                                                                                                                                                                                                                                                                                                                                                                                                                        |  |                                                                                                                                                                                                                                                                                                                                                                                                                                                                                                                                                                                                                                                                                                      |                                                                                            |
|------------------------------------------------------------------------------------------------------------------------------------------------------------------------------------------------------------|----------|------------------------------------------------------------------------------------------------------------------------------------------------------------------------------------------------------------------------------------------------------------------------------------------------------------------------------------------------------------------------------------------------------------------------------------------------------------------------------------------------------------------------------------------------------------------------------------------------------------------------------------------------------------------------------------------------------------------------|--|------------------------------------------------------------------------------------------------------------------------------------------------------------------------------------------------------------------------------------------------------------------------------------------------------------------------------------------------------------------------------------------------------------------------------------------------------------------------------------------------------------------------------------------------------------------------------------------------------------------------------------------------------------------------------------------------------|--------------------------------------------------------------------------------------------|
| <p>1<br/>2<br/>3<br/>4<br/>5<br/>6<br/>7<br/>8<br/>9<br/>10<br/>11<br/>12<br/>13<br/>14<br/>15<br/>16<br/>17<br/>18<br/>19<br/>20<br/>21<br/>22<br/>23<br/>24<br/>25<br/>26<br/>27</p> <p>Participants</p> | <p>6</p> | <p>(a) <i>Cohort study</i> - Give the eligibility criteria, and the sources and methods of selection of participants. Describe methods of follow-up<br/> <i>Case-control study</i> - Give the eligibility criteria, and the sources and methods of case ascertainment and control selection. Give the rationale for the choice of cases and controls<br/> <i>Cross-sectional study</i> - Give the eligibility criteria, and the sources and methods of selection of participants</p> <p>(b) <i>Cohort study</i> - For matched studies, give matching criteria and number of exposed and unexposed<br/> <i>Case-control study</i> - For matched studies, give matching criteria and the number of controls per case</p> |  | <p>RECORD 6.1: The methods of study population selection (such as codes or algorithms used to identify subjects) should be listed in detail. If this is not possible, an explanation should be provided.</p> <p>RECORD 6.2: Any validation studies of the codes or algorithms used to select the population should be referenced. If validation was conducted for this study and not published elsewhere, detailed methods and results should be provided.</p> <p>RECORD 6.3: If the study involved linkage of databases, consider use of a flow diagram or other graphical display to demonstrate the data linkage process, including the number of individuals with linked data at each stage.</p> | <p>Page 5</p> <p>Page 5</p> <p>Page 4<br/>(Reference: Data Linkage Process on Page 11)</p> |
| <p>28<br/>29<br/>30<br/>31<br/>32<br/>33<br/>34</p> <p>Variables</p>                                                                                                                                       | <p>7</p> | <p>Clearly define all outcomes, exposures, predictors, potential confounders, and effect modifiers. Give diagnostic criteria, if applicable.</p>                                                                                                                                                                                                                                                                                                                                                                                                                                                                                                                                                                       |  | <p>RECORD 7.1: A complete list of codes and algorithms used to classify exposures, outcomes, confounders, and effect modifiers should be provided. If these cannot be reported, an explanation should be provided.</p>                                                                                                                                                                                                                                                                                                                                                                                                                                                                               | <p>Page 19, 20</p>                                                                         |
| <p>35<br/>36<br/>37<br/>38<br/>39<br/>40<br/>41<br/>42</p> <p>Data sources/<br/>measurement</p>                                                                                                            | <p>8</p> | <p>For each variable of interest, give sources of data and details of methods of assessment (measurement). Describe comparability of assessment methods if there is more than one group</p>                                                                                                                                                                                                                                                                                                                                                                                                                                                                                                                            |  |                                                                                                                                                                                                                                                                                                                                                                                                                                                                                                                                                                                                                                                                                                      | <p>Page 4, 5</p>                                                                           |

|                                                                                                                                                    |                                  |    |                                                                                                                                                                                                                                                                                                                                                                                                                                                                                                                                                                      |                                                                                                                                                       |           |
|----------------------------------------------------------------------------------------------------------------------------------------------------|----------------------------------|----|----------------------------------------------------------------------------------------------------------------------------------------------------------------------------------------------------------------------------------------------------------------------------------------------------------------------------------------------------------------------------------------------------------------------------------------------------------------------------------------------------------------------------------------------------------------------|-------------------------------------------------------------------------------------------------------------------------------------------------------|-----------|
| 1<br>2<br>3<br>4                                                                                                                                   | Bias                             | 9  | Describe any efforts to address potential sources of bias                                                                                                                                                                                                                                                                                                                                                                                                                                                                                                            |                                                                                                                                                       | N/A       |
| 5<br>6<br>7<br>8<br>9                                                                                                                              | Study size                       | 10 | Explain how the study size was arrived at                                                                                                                                                                                                                                                                                                                                                                                                                                                                                                                            |                                                                                                                                                       | N/A       |
| 10<br>11<br>12<br>13<br>14<br>15<br>16<br>17<br>18<br>19<br>20<br>21<br>22<br>23<br>24<br>25<br>26<br>27<br>28<br>29<br>30<br>31<br>32<br>33<br>34 | Quantitative variables           | 11 | Explain how quantitative variables were handled in the analyses. If applicable, describe which groupings were chosen, and why                                                                                                                                                                                                                                                                                                                                                                                                                                        |                                                                                                                                                       | Page 5, 6 |
| 35<br>36<br>37<br>38<br>39<br>40<br>41<br>42<br>43<br>44<br>45<br>46<br>47                                                                         | Statistical methods              | 12 | (a) Describe all statistical methods, including those used to control for confounding<br>(b) Describe any methods used to examine subgroups and interactions<br>(c) Explain how missing data were addressed<br>(d) <i>Cohort study</i> - If applicable, explain how loss to follow-up was addressed<br><i>Case-control study</i> - If applicable, explain how matching of cases and controls was addressed<br><i>Cross-sectional study</i> - If applicable, describe analytical methods taking account of sampling strategy<br>(e) Describe any sensitivity analyses |                                                                                                                                                       | Page 6    |
|                                                                                                                                                    | Data access and cleaning methods |    | ..                                                                                                                                                                                                                                                                                                                                                                                                                                                                                                                                                                   | RECORD 12.1: Authors should describe the extent to which the investigators had access to the database population used to create the study population. | Page 4    |

|                  |    |                                                                                                                                                                                                                                                                                                                                                 |  |                                                                                                                                                                                                                                                                                                                    |                                                         |
|------------------|----|-------------------------------------------------------------------------------------------------------------------------------------------------------------------------------------------------------------------------------------------------------------------------------------------------------------------------------------------------|--|--------------------------------------------------------------------------------------------------------------------------------------------------------------------------------------------------------------------------------------------------------------------------------------------------------------------|---------------------------------------------------------|
|                  |    |                                                                                                                                                                                                                                                                                                                                                 |  | RECORD 12.2: Authors should provide information on the data cleaning methods used in the study.                                                                                                                                                                                                                    |                                                         |
| Linkage          |    | ..                                                                                                                                                                                                                                                                                                                                              |  | RECORD 12.3: State whether the study included person-level, institutional-level, or other data linkage across two or more databases. The methods of linkage and methods of linkage quality evaluation should be provided.                                                                                          | Page 4<br>(Reference: Data Linkage Process, on Page 11) |
| <b>Results</b>   |    |                                                                                                                                                                                                                                                                                                                                                 |  |                                                                                                                                                                                                                                                                                                                    |                                                         |
| Participants     | 13 | (a) Report the numbers of individuals at each stage of the study ( <i>e.g.</i> , numbers potentially eligible, examined for eligibility, confirmed eligible, included in the study, completing follow-up, and analysed)<br>(b) Give reasons for non-participation at each stage.<br>(c) Consider use of a flow diagram                          |  | RECORD 13.1: Describe in detail the selection of the persons included in the study ( <i>i.e.</i> , study population selection) including filtering based on data quality, data availability and linkage. The selection of included persons can be described in the text and/or by means of the study flow diagram. | Page 5, 6,                                              |
| Descriptive data | 14 | (a) Give characteristics of study participants ( <i>e.g.</i> , demographic, clinical, social) and information on exposures and potential confounders<br>(b) Indicate the number of participants with missing data for each variable of interest<br>(c) <i>Cohort study</i> - summarise follow-up time ( <i>e.g.</i> , average and total amount) |  |                                                                                                                                                                                                                                                                                                                    | Page 6, 7, 14–17                                        |
| Outcome data     | 15 | <i>Cohort study</i> - Report numbers of outcome events or summary measures over time<br><i>Case-control study</i> - Report numbers in each exposure                                                                                                                                                                                             |  |                                                                                                                                                                                                                                                                                                                    | Page 6                                                  |

|                   |    |                                                                                                                                                                                                                                                                                                                                                                                                                 |  |                                                                                                                                                                                                                                                                                                          |           |
|-------------------|----|-----------------------------------------------------------------------------------------------------------------------------------------------------------------------------------------------------------------------------------------------------------------------------------------------------------------------------------------------------------------------------------------------------------------|--|----------------------------------------------------------------------------------------------------------------------------------------------------------------------------------------------------------------------------------------------------------------------------------------------------------|-----------|
|                   |    | category, or summary measures of exposure<br><i>Cross-sectional study</i> - Report numbers of outcome events or summary measures                                                                                                                                                                                                                                                                                |  |                                                                                                                                                                                                                                                                                                          |           |
| Main results      | 16 | (a) Give unadjusted estimates and, if applicable, confounder-adjusted estimates and their precision (e.g., 95% confidence interval). Make clear which confounders were adjusted for and why they were included<br>(b) Report category boundaries when continuous variables were categorized<br>(c) If relevant, consider translating estimates of relative risk into absolute risk for a meaningful time period |  |                                                                                                                                                                                                                                                                                                          | N/A       |
| Other analyses    | 17 | Report other analyses done— e.g., analyses of subgroups and interactions, and sensitivity analyses                                                                                                                                                                                                                                                                                                              |  |                                                                                                                                                                                                                                                                                                          | N/A       |
| <b>Discussion</b> |    |                                                                                                                                                                                                                                                                                                                                                                                                                 |  |                                                                                                                                                                                                                                                                                                          |           |
| Key results       | 18 | Summarise key results with reference to study objectives                                                                                                                                                                                                                                                                                                                                                        |  |                                                                                                                                                                                                                                                                                                          | Page 7, 8 |
| Limitations       | 19 | Discuss limitations of the study, taking into account sources of potential bias or imprecision. Discuss both direction and magnitude of any potential bias                                                                                                                                                                                                                                                      |  | RECORD 19.1: Discuss the implications of using data that were not created or collected to answer the specific research question(s). Include discussion of misclassification bias, unmeasured confounding, missing data, and changing eligibility over time, as they pertain to the study being reported. | Page 8    |
| Interpretation    | 20 | Give a cautious overall interpretation of results considering objectives,                                                                                                                                                                                                                                                                                                                                       |  |                                                                                                                                                                                                                                                                                                          | Page 7, 8 |

|                                                           |    |                                                                                                                                                               |  |                                                                                                                                                          |        |
|-----------------------------------------------------------|----|---------------------------------------------------------------------------------------------------------------------------------------------------------------|--|----------------------------------------------------------------------------------------------------------------------------------------------------------|--------|
|                                                           |    | limitations, multiplicity of analyses, results from similar studies, and other relevant evidence                                                              |  |                                                                                                                                                          |        |
| Generalisability                                          | 21 | Discuss the generalisability (external validity) of the study results                                                                                         |  |                                                                                                                                                          | N/A    |
| <b>Other Information</b>                                  |    |                                                                                                                                                               |  |                                                                                                                                                          |        |
| Funding                                                   | 22 | Give the source of funding and the role of the funders for the present study and, if applicable, for the original study on which the present article is based |  |                                                                                                                                                          | Page 3 |
| Accessibility of protocol, raw data, and programming code |    | ..                                                                                                                                                            |  | RECORD 22.1: Authors should provide information on how to access any supplemental information such as the study protocol, raw data, or programming code. | Page 9 |

\*Reference: Benchimol EI, Smeeth L, Guttman A, Harron K, Moher D, Petersen I, Sørensen HT, von Elm E, Langan SM, the RECORD Working Committee. The REporting of studies Conducted using Observational Routinely-collected health Data (RECORD) Statement. *PLoS Medicine* 2015; in press.

\*Checklist is protected under Creative Commons Attribution ([CC BY](https://creativecommons.org/licenses/by/4.0/)) license.
