# Supplementary material for: Emergency department use for mental and substance use disorders: descriptive analysis of population-based, linked administrative data in British Columbia, Canada
Source: PubMed Central journal article supplement — BMJ Open. 2022 Jan 13;12(1):e057072. doi: 10.1136/bmjopen-2021-057072 (PMC8762129; doi:10.1136/bmjopen-2021-057072), 2022-01-13
Supplement: bmjopen-2021-057072supp001.pdf [file bmjopen-2021-057072supp001.pdf]

**Appendix 1.** List of fee codes included in identification of ED visits using Medical Services Plan Payment data

| <b>FEE ITEM</b> | <b>DESCRIPTION</b>                                        |
|-----------------|-----------------------------------------------------------|
| 1811            | LEVEL I EMERGENCY CARE - DAY                              |
| 1812            | 01812 LEVEL II EMERGENCY CARE - DAY                       |
| 1813            | 01813 LEVEL III EMERGENCY CARE - DAY                      |
| 1821            | 01821 LEVEL I EMERGENCY CARE - EVENING                    |
| 1822            | 01822 LEVEL II EMERGENCY CARE - EVENING                   |
| 1823            | 01823 LEVEL III EMERGENCY CARE - EVENING                  |
| 1831            | 01831 LEVEL I EMERGENCY CARE - NIGHT                      |
| 1832            | 01832 LEVEL II EMERGENCY CARE - NIGHT                     |
| 1833            | 01833 LEVEL III EMERGENCY CARE - NIGHT                    |
| 1841            | 01841 LEVEL I EMERGENCY CARE - SAT, SUN, OR STAT HOL      |
| 1842            | 01841 LEVEL I EMERGENCY CARE - SAT, SUN, OR STAT HOL      |
| 1843            | 01841 LEVEL I EMERGENCY CARE - SAT, SUN, OR STAT HOL      |
| 96801           | 96801 APB-LEVEL I EMERGENCY CARE DAY                      |
| 96802           | 96802 APB - LEVEL 2 EMERGENCY CARE - DAY                  |
| 96803           | 96803 APB - LEVEL 3 EMERGENCY CARE - DAY                  |
| 96804           | 96804 APB- LEVEL 4 EMERGENCY CARE - DAY                   |
| 96805           | 96805 APB - LEVEL 5 EMERGENCY CARE - DAY                  |
| 96811           | 96811 APB-LEVEL I EMERGENCY CARE - EVENING                |
| 96812           | 96812 APB - LEVEL 2 EMERGENCY CARE - EVENING              |
| 96813           | 96813 APP - LEVEL 3 EMERGENCY CARE - EVENING              |
| 96814           | 96814 APB - LEVEL 4 EMERGENCY CARE - EVENING              |
| 96815           | 96815 APB - LEVEL 5 EMERGENCY CARE - EVENING              |
| 96821           | 96821 APB - LEVEL 1 EMERGENCY CARE - NIGHT                |
| 96822           | 96822 APB - LEVEL 2 EMERGENCY CARE - NIGHT                |
| 96823           | 96823 APB -LEVEL 3 EMERGENCY CARE - NIGHT                 |
| 96824           | 96824 APB - LEVEL 4 EMERGENCY CARE - NIGHT                |
| 96825           | 96825 APB - LEVEL 5 EMERGENCY CARE - NIGHT                |
| 36347           | 36347 NP - VISIT, EMERGENCY (BETWEEN 0800 AND 1800 HRS)   |
| 36440           | 36440 NP - SIMPLE/FASTRACK VISIT IN EMERGENCY (AGE 50-59) |
| 36441           | 36441 NP - EMERGENCY DEPARTMENT VISIT (AGE 50-59)         |
| 36447           | 36447 NP - SIMPLE/FASTRACK VISIT IN EMERGENCY (AGE 2-19)  |
| 36448           | 36448 NP - EMERGENCY DEPARTMENT VISIT (AGE 2-19)          |
| 36601           | 36601 NP - SIMPLE/FASTRACK VISIT IN EMERGENCY (AGE 0-1)   |
| 36602           | 36602 NP - SIMPLE/FASTRACK VISIT IN EMERGENCY (AGE 2-59)  |
| 36603           | 36603 NP - SIMPLE/FASTRACK VISIT IN EMERGENCY (AGE 60-69) |
| 36604           | 36604 NP - SIMPLE/FASTRACK VISIT IN EMERGENCY (AGE 70-79) |
| 36605           | 36605 NP - SIMPLE/FASTRACK VISIT IN EMERGENCY (AGE 80+)   |
| 36606           | 36606 NP - VISIT IN EMERGENCY DEPARTMENT (AGE 0-1)        |
| 36607           | 36607 NP - VISIT IN EMERGENCY DEPARTMENT (AGE 2-59)       |
| 36608           | NP - VISIT IN EMERGENCY DEPARTMENT (AGE 60-69)            |

- 36609 NP - VISIT IN EMERGENCY DEPARTMENT (AGE 70-79)  
36610 NP - VISIT IN EMERGENCY DEPARTMENT (AGE 80+)

**Appendix 2.** Disorder groupings and associated diagnosis codes

|                                                      | <b>ICD-9 codes<br/>(MSP claims)</b> | <b>ICD-10 codes<br/>(Hospital Discharge Data)</b> | <b>NACRS Codes</b>                                                                       |
|------------------------------------------------------|-------------------------------------|---------------------------------------------------|------------------------------------------------------------------------------------------|
| <b>Mood and anxiety</b>                              |                                     |                                                   |                                                                                          |
| Depressive disorders                                 | 311                                 | F32, F33, F34.1                                   | F329                                                                                     |
| Anxiety disorders                                    | 300                                 | F40, F41                                          | F419                                                                                     |
| Anxiety/depression (code unique to MSP)              | 50B                                 |                                                   |                                                                                          |
| Bipolar and related disorders                        | 296                                 | F30, F31, F34 (excluding F34.1), F38, F29         | F319                                                                                     |
| <b>Substance use</b>                                 |                                     |                                                   |                                                                                          |
| Substance use                                        | 292, 304, 305                       | F11, F12, F13, F14, F15, F16, F17, F18, F19       | F119, T401, F129, T407, F159, F149, 1405, F169, 1409, 1406, F180, F199, F139, T424, T439 |
| Alcohol                                              | 291, 303                            | F10                                               | F100, F103, T510                                                                         |
| <b>Schizophrenia spectrum</b>                        |                                     |                                                   |                                                                                          |
|                                                      | 295, 297, 298                       | F20, F21, F22, F23, F24, F25, F28, F29            | F209, F239                                                                               |
| <b>Post-traumatic stress and adjustment disorder</b> |                                     |                                                   |                                                                                          |
|                                                      | 308, 309                            | F43                                               |                                                                                          |
| <b>Other mental disorders</b>                        |                                     |                                                   |                                                                                          |
| Neurocognitive                                       | 290, 293, 294                       | F01, F03, F04, F05, F06, F09                      | F03, F059                                                                                |
| Personality disorders                                | 301                                 | F60, F61, F62                                     | F489, F609                                                                               |
| Eating                                               | 307.1, 307.5                        | F50                                               | F509                                                                                     |
| ADHD                                                 | 314                                 | F90                                               |                                                                                          |
| Intellectual disability                              | 317, 318, 319                       | F71, F71, F72, F73, F78, F79                      |                                                                                          |
